# Multi-ancestry meta-analyses of lung cancer in the Million Veteran Program reveal novel risk loci and elucidate smoking-independent genetic risk

Bryan R. Gorman<sup>1,2</sup>, Sun-Gou Ji<sup>1,15</sup>, Michael Francis<sup>1,2</sup>, Anoop K. Sendamarai<sup>1,16</sup>, Yunling Shi<sup>1</sup>, Poornima Devineni<sup>1</sup>, Uma Saxena<sup>1</sup>, Elizabeth Partan<sup>1</sup>, Andrea K. DeVito<sup>1,2</sup>, Jinyoung Byun<sup>11,12</sup>, Younghun Han<sup>11,12</sup>, Xiangjun Xiao<sup>11,12</sup>, Don D. Sin<sup>3</sup>, Wim Timens<sup>4,5</sup>, Jennifer Moser<sup>6</sup>, Sumitra Muralidhar<sup>6</sup>, Rachel Ramoni<sup>6</sup>, Rayjean J. Hung<sup>7</sup>, James D. McKay<sup>8</sup>, Yohan Bossé<sup>9</sup>, Ryan Sun<sup>10</sup>, Christopher I. Amos<sup>11,12,13</sup>, VA Million Veteran Program, Saiju Pyarajan<sup>1,14,‡</sup>

<sup>1</sup>Center for Data and Computational Sciences (C-DACS), VA Boston Healthcare System, Boston, MA, USA, <sup>2</sup>Booz Allen Hamilton, McLean, VA, USA, <sup>3</sup>The University of British Columbia Centre for Heart Lung Innovation, St Paul's Hospital, Vancouver, British Columbia, Canada, <sup>4</sup>University Medical Centre Groningen, GRIAC (Groningen Research Institute for Asthma and COPD), University of Groningen, Groningen, Netherlands, <sup>5</sup>Department of Pathology & Medical Biology, University Medical Centre Groningen, University of Groningen, Groningen, Netherlands, <sup>6</sup>Office of Research and Development, Department of Veterans Affairs, Washington, DC, USA. <sup>7</sup>Lunenfeld-Tanenbaum Research Institute, Sinai Health System, University of Toronto, Toronto, Ontario, Canada, <sup>8</sup>Section of Genetics, International Agency for Research on Cancer, World Health Organization, Lyon, France, <sup>9</sup>Institut universitaire de cardiologie et de pneumologie de Québec, Department of Molecular Medicine, Laval University, Quebec City, Quebec, Canada, <sup>10</sup>Department of Biostatistics, University of Texas MD Anderson Cancer Center, Houston, TX, USA, <sup>11</sup>Institute for Clinical and Translational Research, Baylor College of Medicine, Houston, TX, USA, <sup>12</sup>Department of Medicine, Section of Epidemiology and Population Sciences, Baylor College of Medicine, Houston, TX, USA, <sup>13</sup>Dan L Duncan Comprehensive Cancer Center, Baylor College of Medicine, Houston, TX, USA, <sup>14</sup>Department of Medicine, Brigham and Women's Hospital, Harvard Medical School, Boston, MA, USA, <sup>15</sup>Present address: Sun-Gou Ji, BridgeBio Pharma, Palo Alto, CA, USA, <sup>16</sup>Present address: Carbone Cancer Center, University of Wisconsin, Madison, WI, USA. <sup>‡</sup>Saiju Pyarajan: saiju.pyarajan@va.gov

34 **Abstract**

35 Lung cancer remains the leading cause of cancer mortality, despite declines in smoking  
36 rates. Previous lung cancer genome-wide association studies (GWAS) have identified  
37 numerous loci, but separating the genetic risks of lung cancer and smoking behavioral  
38 susceptibility remains challenging. We performed multi-ancestry GWAS meta-analyses  
39 of lung cancer using the Million Veteran Program (MVP) cohort and a previous study of  
40 European-ancestry individuals, comprising 42,102 cases and 181,270 controls, followed  
41 by replication in an independent cohort of 19,404 cases and 17,378 controls. We further  
42 performed conditional meta-analyses on cigarettes per day and identified two novel,  
43 replicated loci, including the 19p13.11 pleiotropic cancer locus in LUSC. Overall, we  
44 report twelve novel risk loci for overall lung cancer, lung adenocarcinoma (LUAD), and  
45 squamous cell lung carcinoma (LUSC), nine of which were externally replicated. Finally,  
46 we performed phenome-wide association studies (PheWAS) on polygenic risk scores  
47 (PRS) for lung cancer, with and without conditioning on smoking. The unconditioned  
48 lung cancer PRS was associated with smoking status in controls, illustrating reduced  
49 predictive utility in non-smokers. Additionally, our PRS demonstrates smoking-  
50 independent pleiotropy of lung cancer risk across neoplasms and metabolic traits.

51

## 52 Introduction

53 Lung cancer remains the leading cause of overall cancer mortality, as the most  
54 prevalent cancer type in men, and the second highest in women after breast cancer<sup>1-3</sup>.  
55 Despite declines in smoking rates in the US since the 1980s<sup>4</sup>, tobacco use is currently  
56 implicated in upwards of 80% of lung cancer diagnoses<sup>1</sup>. Even in those who have never  
57 smoked, nor had meaningful exposure to environmental carcinogens<sup>1,5</sup>, there exists a  
58 heritable risk component of lung cancer conferred by genetic factors<sup>6-8</sup>. Differentiating  
59 the mutations which directly predispose an individual to lung cancer from those whose  
60 effect is mediated through environmental components remains challenging.

61 Genome-wide association studies (GWAS) have identified lung cancer risk  
62 variants associated with oncogenic processes such as immune response<sup>7</sup>, cell cycle  
63 regulation<sup>9</sup>, and those affecting DNA damage response and genomic stability<sup>8</sup>. Several  
64 lung cancer GWAS have also reported strong effects of genes such as *CHRNA* nicotine  
65 receptor genes which putatively increase the risk of lung cancer through behavioral  
66 predisposition towards smoking<sup>5</sup>. Characteristic molecular markers and genetic risk  
67 factors in smokers and never-smokers have been identified<sup>10,11</sup>, though fewer variants  
68 have been found in GWAS performed exclusively in never-smokers<sup>12</sup>.

69 Lung cancer has a heterogeneous genetic architecture across ancestral  
70 groups<sup>13,14</sup>. In the two most well-studied ancestries, European (EA) and East Asian  
71 (EAS), the majority of genome-wide significant loci are not shared<sup>15,16</sup>; this is in  
72 agreement with molecular studies showing differences in tumor characteristics between  
73 EA and EAS<sup>17</sup>. Smaller African ancestry (AA) cohorts have replicated known loci from  
74 EA or EAS<sup>8,18</sup>, though no AA-specific GWAS loci have been reported.

75 In this study, we examined lung cancer genetic variation in EA as well as in the  
76 largest AA cohort to-date. Our discovery analysis is performed in an older cohort of  
77 mostly male US veterans in the Department of Veterans Affairs Million Veteran Program  
78 (MVP)<sup>19</sup>. Lung cancer incidence is approximately twice as high in men than in women<sup>2</sup>,  
79 and additionally MVP contains a large number of cigarette smokers, positioning this  
80 biobank as particularly valuable for this analysis. We performed GWAS in overall cases  
81 of lung cancer as well as two non-small cell lung cancer (NSCLC) subtypes,  
82 adenocarcinoma (LUAD) and squamous cell lung carcinoma (LUSC).

83

## 84 **Results**

### 85 *Genome-wide association studies for lung cancer*

86 We performed a GWAS on overall lung cancer within EA participants in MVP  
87 (10,398 lung cancer cases and 62,708 controls; Supplementary Data 1), followed by a  
88 meta-analysis with the EA International Lung Cancer Consortium OncoArray study  
89 (ILCCO; McKay et al., 2017)<sup>7</sup>, for a total of 39,781 cases and 119,158 controls  
90 (Supplementary Fig. 1). The EA meta-analysis for overall lung cancer identified 26  
91 conditionally independent SNPs within 17 genome-wide significant loci ( $P < 5 \times 10^{-8}$ ;  
92 Supplementary Fig. 2a; Supplementary Data 2). All 12 loci reported by ILCCO<sup>7</sup> were  
93 confirmed, with consistent direction of effect on all single nucleotide polymorphisms  
94 (SNPs) with  $P < 1 \times 10^{-5}$ , as well as high correlation of effect sizes and allele frequency  
95 (Supplementary Fig. 3). Of the 17 genome-wide significant loci for overall lung cancer,  
96 four were novel with respect to the broader literature: neuronal growth regulator

97 *LSAMP*, WNT signaling regulator *NMUR2*, DNA damage repair protein *XCL2*, and  
98 hedgehog signaling regulator *TULP3*, (Table 1; Supplementary Fig. 4a-d).

99 Further association tests stratified by cancer subtypes LUAD and LUSC in MVP  
100 EA (Supplementary Fig. 2bc; Supplementary Data 3-4) replicated associations reported  
101 by ILCCO<sup>7</sup> (Supplementary Fig. 3) and identified additional loci. Two novel EA meta-  
102 analysis loci were identified for LUAD, proto-oncogene *MYC* and Wnt signaling inhibitor  
103 *TLE3* (Table 1; Supplementary Fig. 4e-h). For LUSC, we identified one novel locus at  
104 10q24.31 near NFκB inhibitor *CHUK* and *BLOC1S2*. Across all subtypes for EA meta-  
105 analysis index variants, the MVP cohort had associations with  $P < 0.05$  in all but one in  
106 overall lung cancer, five in LUAD, including approximately nominal significance at  
107 rs67824503 (*MYC*;  $P = 0.057$ ), and one in LUSC (Supplementary Data 2-4).

108 We investigated expression quantitative trait loci (eQTL) relationships between  
109 top SNPs from the EA meta-analysis across all lung cancer GWAS in GTEx v8 Lung<sup>20</sup>  
110 and the Lung eQTL Consortium<sup>21</sup> (Supplementary Data 2-4). This analysis showed that  
111 the LUSC index SNP rs36229791 on 10q24.31 was associated with the mRNA  
112 expression levels of *BLOC1S2* (Fig. 1a-d), consistent with previous TWAS<sup>22</sup>. *BLOC1S2*  
113 is an oncogene whose gene product is associated with centrosome function;  
114 centrosomal abnormalities have previously been observed *in vitro* in LUSC<sup>23,24</sup>.

115 We improved our variant selection by fine-mapping and estimating credible sets  
116 of candidate causal variants in EA meta analysis using sum of single effects (SuSiE)<sup>25,26</sup>  
117 modeling. For overall lung cancer, LUAD, and LUSC, we identified 23, 23, and 9 high  
118 quality credible sets, respectively, containing 370, 246, and 192 total SNPs  
119 (Supplementary Data 5).

120

121 *GWAS in AA*

122 We analyzed overall lung cancer risk in 2,438 cases and 62,112 controls of  
123 African ancestry (AA), the largest AA GWAS discovery cohort to date (Supplementary  
124 Fig. 5a). Two loci reached genome-wide significance in our discovery scan: 15q25,  
125 replicating the association in *CHRNA5* for AA populations reported by an earlier  
126 GWAS<sup>18</sup>, and a putative novel locus at 12q23 with index SNP rs78994068 (Table 1; Fig.  
127 1e). We further performed GWAS in AA within LUAD and LUSC subtypes but found no  
128 genome-wide significant associations (Supplementary Fig. 5b-c).

129 The putative AA locus at 12q23 is driven by six SNPs in high linkage  
130 disequilibrium (LD;  $R^2 > 0.8$ ) found in long non-coding RNAs *LINC00943* and *LINC00944*  
131 (Fig. 1e). These imputed SNPs all had odds ratios (ORs) close to 2, with 1.3%  
132 frequency in AA and 0% in EA, consistent with gnomAD v3. *LINC00944* is highly  
133 expressed in immune cells and blood, and enriched in T cell pathways in lung tissue  
134 and cancer<sup>27-30</sup>. We fine-mapped this locus to define a 95% credible set  
135 (Supplementary Data 6), and annotated the functional consequence of the variants  
136 using the Variant Effect Predictor (VEP)<sup>31</sup>. Two variants, rs78994068 and rs115962601,  
137 were in a known enhancer regulatory region (ENSR00000974920) and thus may involve  
138 regulatory changes. However, this locus was directionally consistent but not significant  
139 in our AA replication cohort (discussed below); therefore, larger-scale AA analyses are  
140 needed to confirm this finding.

141

## 142 *GWAS multi-ancestry meta-analysis*

143 We conducted a fixed-effect inverse variance-weighted multi-ancestry meta-  
144 analysis, combining the EA meta-analysis and the MVP AA GWAS for overall lung  
145 cancer, LUAD, and LUSC (Supplementary Data 7-9; Supplementary Fig. 6a-c). This  
146 analysis identified two additional novel genome-wide significant loci in overall lung  
147 cancer (Table 1; Supplementary Fig. 4i-j): ubiquitin ligase *JADE2*, previously associated  
148 with smoking initiation<sup>32</sup>, and RNA polymerase-associated *RPAP3*. Neither of these  
149 novel multi-ancestry meta-analysis loci were reported in a recent multi-ancestry analysis  
150 by Byun et al.<sup>8</sup> that included fewer AA and more Asian ancestry samples, indicating the  
151 value our larger AA sample provided for novel discovery. All genome-wide significant  
152 EA meta-analysis associations reached genome-wide significance in the multi-ancestry  
153 meta-analysis except rs11855650 (*TLE3*) in LUAD ( $P=6.19\times 10^{-8}$ ). We additionally  
154 performed random effects meta-analyses using the Han-Eskin method (RE2)<sup>33</sup>, and  
155 observed similar *P*-values to the fixed effect meta-analysis, with all index variants  
156  $P_{RE2}<5\times 10^{-8}$  (Supplementary Data 7-9).

157

## 158 *Polygenic risk scoring*

159 To gain an understanding of the penetrance and pleiotropy of lung cancer risk,  
160 we constructed PRSs based on the ILCCO summary statistics<sup>7</sup> for every EA subject in  
161 MVP. As expected, the PRS was highly associated with both lung cancer risk as well as  
162 smoking behavior (Supplementary Fig. 7a-b). Even after removing individuals with any  
163 history of lung cancer risk to prevent enrichment of risk factors and comorbidities, the  
164 association with smoking behavior remained, suggesting that the PRS is partially

165 capturing genetic smoking behavioral risk factors (Supplementary Fig. 7c). In all groups,  
166 individuals at the top decile of the PRS were at significantly higher risk of lung cancer  
167 than those in the lowest decile.

#### 168 *Multi-trait conditional analysis for smoking status*

169 Despite adjusting for smoking status, both in MVP EA and ILCCO<sup>7</sup>, a significant  
170 genetic correlation was observed between all subsets of lung cancer GWAS and a  
171 recently published GWAS of smoking behaviors<sup>34</sup> (Fig. 2a, Supplementary Data 10). In  
172 order to remove all residual effects of smoking on lung cancer susceptibility, we  
173 conducted a multi-trait-based conditional and joint analysis (mtCOJO)<sup>35,36</sup>, conditioning  
174 on a GWAS for cigarettes per day<sup>34</sup>, which was the smoking trait most strongly  
175 correlated with overall lung cancer and subtype GWAS from the EA meta-analysis.  
176 Because lung cancer case selection also preferentially selects smokers, conventional  
177 adjustment for smoking may inadvertently cause selection bias, which functions as a  
178 collider to induce biased genetic effects<sup>37</sup>. mtCOJO is considered more robust to  
179 potential collider bias than conventional covariate adjustment<sup>35,36</sup>. The total observed-  
180 scale SNP-heritability<sup>38</sup> of lung cancer risk decreased substantially after conditioning on  
181 cigarettes per day, from 5.4% to 3.1% in overall LC, from 6.7% to 5.5% in LUAD, and  
182 from 5.8% to 3.8% in LUSC (Fig. 2b; Supplementary Data 11).

183 Significant loci from the conditional analyses are shown in Supplementary Fig. 8-  
184 9 and Supplementary Data 12-14. As expected, the statistical significance of loci  
185 harboring smoking-related genes (e.g., *CHRNA5*, *CYP2A6*, *CHRNA4*) dropped to below  
186 genome-wide significance after conditioning (Fig. 3). Conversely, five signals (four loci)  
187 became significant only after conditioning, including novel signals at *MMS22L* in overall



188 lung cancer and 19p13.1 (*ABHD8*) in LUSC. *MMS22L* is a novel GWAS signal but was  
189 previously identified as overexpressed in lung cancer in genome-wide gene expression  
190 scan<sup>39</sup>. These may represent biological lung cancer signals partially masked by  
191 countervailing genetic effects on smoking behavior. We performed fine-mapping to  
192 identify candidate causal variants in the conditioned EA meta-analysis summary  
193 statistics, and for overall lung cancer, LUAD, and LUSC, we identified 11, 15, and 6 high  
194 quality credible sets, respectively, containing a total of 243, 277, and 78 SNPs  
195 (Supplementary Data 5).

196 We constructed PRS based on mtCOJO-conditioned ILCCO summary statistics<sup>7</sup>  
197 to directly compare the predictive performance of PRS derived from the conditioned and  
198 non-conditioned GWAS in MVP EA. While the PRS based on the non-conditioned  
199 overall lung cancer GWAS exhibited reduced performance in never-smokers compared  
200 to ever-smokers, the PRS based on the conditional analysis resulted in similar  
201 performance across smoking status (Fig. 2c; Supplementary Data 15).

202

### 203 *Replication of novel variants in OncoArray and combined meta-analysis*

204 We queried the OncoArray Consortium Lung Study (OncoArray) as an external  
205 non-overlapping replication dataset for our significant GWAS signals (Supplementary  
206 Data 16-17). For GWAS in EA meta-analysis for overall lung cancer, LUAD, and LUSC,  
207 we replicated five of seven novel loci ( $P < 0.01$ ) in an OncoArray European ancestry  
208 cohort: *XCL2* and *TLE3* in overall lung cancer, *MYC* and *TLE3* in LUAD, and *BLOC1S2*  
209 in LUSC. The novel African ancestry association for overall lung cancer at *LINC00944*  
210 was not replicated. We meta-analyzed OncoArray European and African ancestry

211 participants to replicate our multi-ancestry meta-analysis signals for overall lung cancer  
212 at *RPAP3* ( $P=0.0044$ ) and *JADE2* which bordered on nominal significance (rs329122;  
213  $P=0.053$ ). For the two novel loci which were identified in EA meta-analysis conditioned  
214 on cigarettes per day, we included smoking as a covariate for association analysis in  
215 the OncoArray European ancestry cohort. These association signals were replicated for  
216 overall lung cancer at *MMS22L* ( $P=0.006$ ) and LUSC at *ABHD8* ( $P=0.003$ ). In a variant-  
217 level replication of 137 conditionally independent discovery associations which fell  
218 within  $\leq 1$  Mb of a previously reported lung cancer GWAS signal, 134 had  $P < 0.05$  in  
219 OncoArray, and 42 had  $P < 5 \times 10^{-8}$  (Supplementary Data 18).

220 We then performed a combined meta-analysis of our discovery results with  
221 OncoArray replication results (Supplementary Data 18). We considered a conservative  
222 threshold of  $P=4.17 \times 10^{-9}$  ( $P=5 \times 10^{-8}/12$  total GWAS analyses) to be significant, which  
223 was met by 9 of the 12 loci. Because rs329122 in *JADE2* achieved the more  
224 conservative significance threshold ( $P=3.69 \times 10^{-9}$ ), and has also been associated with  
225 smoking behavior<sup>32</sup> and identified as a splicing-related variant associated with lung  
226 cancer<sup>40</sup>, we considered this locus to be replicated. In the combined meta-analysis we  
227 observed similar  $P$ -values in fixed effects and random effects (RE2) models.

228 Next, for all previously reported lung cancer and subtype loci in this study, we  
229 identified lung cancer associations from GWAS Catalog which fell within the same loci  
230 as our index variants (Supplementary Data 19). We confirmed two loci that previously  
231 had been reported only in a recent genome-wide association by proxy (GWAX) of lung  
232 cancer<sup>41</sup>: *CENPC* (rs75675343) in overall lung cancer in the EA meta-analysis  
233 ( $P=2.40 \times 10^{-8}$ ) and the multi ancestry meta-analysis, and *TP53BP1* in overall lung

234 cancer in the multi-ancestry meta-analysis (rs9920763;  $P=1.63\times 10^{-8}$ ). Our multi-  
235 ancestry meta-analysis for overall lung cancer also confirmed a recently reported locus  
236 at 4q32.2 (*NAF1*)<sup>15</sup> in East Asian ancestry.

237

### 238 *Multi-trait analysis with breast cancer*

239 At 19p13.1, a known pleiotropic cancer locus<sup>42,43</sup>, the index SNP of LUSC  
240 conditioned on smoking (rs61494113) sits in a gene-rich region where a recent fine-  
241 mapping effort of breast cancer risk loci<sup>44</sup> proposed two independent associations, one  
242 affecting the regulation of *ABHD8* and *MRPL34*, and another causing a coding mutation  
243 in *ANKLE1*. Here, we used the increased power provided by a multi-trait analysis of  
244 GWAS (MTAG)<sup>45</sup> of LUSC and estrogen receptor negative (ER-) breast cancer<sup>46</sup> to  
245 disentangle the complex relationships between cancer risk and the genes in this locus  
246 (Fig. 4a). Overexpression of *ABHD8* has been shown to significantly reduce cell  
247 migration<sup>42,43</sup>. Similar odds ratios at rs61494113 were observed across LUSC and  
248 breast cancer, and MTAG enhanced the GWAS signal at this locus (Fig. 4b).

249 We used the coloc-SuSiE method<sup>47</sup> to assess colocalized associations between  
250 pairs of credible sets in this locus underlying the risk of LUSC and ER- breast cancer,  
251 allowing for multiple causal signals. We found evidence for a shared causal signal  
252 between credible sets in the LUSC conditional meta-analysis and ER- breast cancer  
253 (97.7% posterior probability; Supplementary Data 20). The index SNPs for the credible  
254 sets of LUSC conditioned on smoking and ER- breast cancer (rs61494113 and  
255 rs56069439, respectively) have  $r^2=0.99$ .

256 The eQTL effect of *ABHD8* was replicated in multiple tissues of GTEx v8,  
257 including Lung (Fig. 4c). Interestingly, the group of SNPs in the LUSC-BC credible set  
258 did not have the most significant eQTL effect, suggesting a complex relationship  
259 between the multiple causal variants at the locus and gene expression (Fig. 4d). For  
260 instance, a recent splice variant analysis<sup>48</sup> implicated splicing of *BABAM1* (a BRCA1-  
261 interacting protein) as a culprit of the associations observed in 19p13.1. Consistent with  
262 previous reports<sup>42,43</sup>, the cancer risk-increasing haplotype was correlated with increased  
263 expression of *ABHD8* and alternative splicing of *BABAM1*. However, there was no  
264 overlap between the 95% eQTL credible sets of *ABHD8* and *BABAM1*, and neither of  
265 the credible sets included rs61494113.

266

#### 267 *Phenome-wide association study*

268 Finally, to investigate the pleiotropy of lung cancer genetic risk in the absence of  
269 the overwhelming effect of smoking behavior, we performed PheWAS in MVP using the  
270 PRS scores constructed from the ILCCO summary statistics<sup>7</sup> for overall lung cancer,  
271 both based on the standard GWAS (“unconditioned PRS”; Fig. 5a; Supplementary Data  
272 21) and the GWAS conditioned on cigarettes per day using mtCOJO (“conditioned  
273 PRS”; Fig. 5b; Supplementary Data 22). Each PRS was tested for association with  
274 1,772 phecode-based phenotypes. Overall, 240 phenotypes were associated with the  
275 unconditioned PRS and 112 were associated with the conditioned PRS at a Bonferroni-  
276 corrected significance threshold ( $P < 0.05/1,772$ ). Although lung cancer remained a top  
277 association with the conditioned PRS, the association with tobacco use disorder was  
278 greatly reduced, from an OR associated with a standard deviation increase in the PRS

279 of 1.151 [1.142-1.160] ( $P=2.32\times 10^{-237}$ ) in the unconditioned PRS to OR=1.046 [1.038-  
280 1.053] ( $P=1.05\times 10^{-32}$ ) in the conditioned PRS. However, the effect on alcohol use  
281 disorder was only modestly attenuated between the unconditioned (OR=1.098 [1.089-  
282 1.108];  $P=1.05\times 10^{-87}$ ) and conditioned LC (OR=1.078 [1.069-1.088],  $P=4.41\times 10^{-60}$ )  
283 PRSs. Whether a role for alcohol in lung cancer exists independently of smoking is  
284 controversial<sup>49,50</sup>; this analysis suggests that may be the case. Other putatively  
285 smoking-related associations, such as chronic obstructive pulmonary disease,  
286 pneumonia, and peripheral vascular disease were greatly diminished with the  
287 conditioned PRS. Mood disorders, depression, and post-traumatic stress disorder, were  
288 also significantly associated with the unconditioned PRS but no longer significantly  
289 associated with the conditioned PRS, reflecting neuropsychiatric correlates of smoking  
290 behavior.

291 Intriguingly, a category of metabolic traits that were not associated with the  
292 unconditioned PRS were highly associated with the conditioned PRS and in a negative  
293 effect direction. We observed protective associations of the conditioned PRS with  
294 metabolic traits such as type 2 diabetes (OR=0.945 [0.938-0.952],  $P=9.46\times 10^{-52}$ ) and  
295 obesity (OR=0.952 [0.945-0.959],  $P=2.48\times 10^{-41}$ ). Neither were associated with the  
296 unconditioned PRS (OR=1.006 [0.999-1.014];  $P=0.092$ , and OR=1.005 [0.998-1.012];  
297  $P=0.183$ , respectively). Other traits in this category included sleep apnea and  
298 hyperlipidemia. These findings are consistent with prior observational findings of an  
299 inverse relationship between BMI and lung cancer<sup>51</sup> and illustrate the extent to which  
300 smoking may be a major confounder of this relationship.

301 Finally, we observed strong associations of the lung cancer PRS with skin cancer  
302 and related traits, such as actinic keratitis. In basal cell carcinoma, the OR increased  
303 from 1.087 [1.072-1.102] ( $P=6.06\times 10^{-32}$ ) with the unconditioned PRS to 1.105 [1.090-  
304 1.120] ( $P=1.82\times 10^{-47}$ ) with the conditioned PRS. As a sensitivity analysis, we tested the  
305 strength of this association after removing the *TERT* locus, which is prominently  
306 associated with both traits. Doing so only modestly reduced the effect of the conditioned  
307 PRS to OR=1.092 [1.077-1.107] ( $P=4.08\times 10^{-36}$ ). Thus, our results are consistent with a  
308 genome-wide genetic correlation between lung cancer and basal cell carcinoma that is  
309 strengthened when the effect of smoking is removed. Overall, our results suggest that  
310 the biology underlying lung cancer risk may be partially masked by the residual genetic  
311 load of smoking.

312

## 313 **Discussion**

314 We identified novel lung cancer-associated loci in a new cohort of EA and AA  
315 participants, including the largest AA cohort analyzed to-date. We also show that,  
316 despite studies on the genetic basis of lung cancer risk taking smoking status into  
317 account, the effects of smoking continue to obfuscate our understanding of lung cancer  
318 genetics. In particular, we report two novel loci, at *MMS22L* (overall) and *ABHD8*  
319 (*LUSC*), which may be partially masked by countervailing genetic effects on smoking.  
320 Our replication analysis which adjusted for smoking pack-years confirmed these loci.  
321 Additionally, our analyses demonstrated that PRSs for lung cancer contain large  
322 uncorrected genetic loading for smoking behavioral factors. Our results indicate that  
323 controlling for these factors can improve risk assessment models, potentially improving

324 lung cancer screening even for non-smokers. Finally, our phenomic scans comparing  
325 PRSs derived from GWAS with and without genomic conditioning on smoking showed  
326 divergent associations across numerous traits, especially metabolic phenotypes.

327         The increased sample size in this study enabled the interpretation of multiple  
328 causal variants underlying the gene-rich *ADHL8-BABAM1* region, synthesizing prior  
329 observations into a clearer understanding of this locus. Our other novel loci strengthen  
330 established lung cancer mechanisms. We identify for the first time a susceptibility locus  
331 at *MYC*, a well-known oncogene and master immune regulator. *XCL2* is involved in  
332 cellular response to inflammatory cytokines<sup>52</sup>. *LSAMP* is a tumor suppressor gene in  
333 osteosarcoma<sup>53</sup>, and 3q13.31 homozygous deletions have been implicated in  
334 tumorigenesis<sup>54</sup>. *TLE3* is a transcriptional corepressor involved in tumorigenesis and  
335 immune function<sup>55</sup>. The transcription factor *TULP3* has been implicated in pancreatic  
336 ductal adenocarcinoma and colorectal cancer<sup>56</sup>. *XCL2*, *NMUR2*, and *TULP3* may also  
337 be related to cancer progression via G-protein-coupled receptor (GPCR) signaling  
338 pathways<sup>57</sup>. *JADE2* expression has been experimentally linked to NSCLC<sup>58</sup>, and has  
339 been identified in GWAS of smoking behavior<sup>34</sup>. Finally, DNA damage repair  
340 mechanisms emerge, including *RPAP3*, an RNA polymerase that may be involved in  
341 DNA damage repair regulation<sup>59</sup>, and *MMS22L* which repairs double strand breaks<sup>60</sup>.

342         Although smoking is the major risk factor for lung cancer, it is important to clearly  
343 disentangle the effect of smoking to fully understand the complex genetic and  
344 environmental causes of lung cancer. Our approach enables the development of new  
345 polygenic scores, which can improve precision medicine applications for lung cancer in  
346 both smokers and nonsmokers.

347 **Author contributions statement**

348 Drafted the manuscript: B.R.G., M.F., S.-G. J., A.K.S., E.P., A.K.D., S.P.

349 Acquired the data: B.R.G., S.-G. J., A.K.S., Y.S., P.D., U.S., D.D.S., W.T., J.M., S.M.,  
350 R.R., R.J.H., J.D.M., Y.B., C.I.A., S.P.

351 Analyzed the data: B.R.G., S.-G. J., M.F., A.K.S., Y.S., P.D., U.S., Y.B., R.S.

352 Critically revised the manuscript for important intellectual content: all authors.

353 **Acknowledgements**

354 This work was supported by award #MVP000 from the United States Department  
355 of Veterans Affairs (VA) Million Veteran Program. The contents of this publication are  
356 the sole responsibility of the authors and do not necessarily represent the views of VA  
357 or the United States Government. Where authors are identified as personnel of the  
358 International Agency for Research on Cancer/World Health Organization, the authors  
359 alone are responsible for the views expressed in this article, and they do not necessarily  
360 represent the decisions, policy, or views of the International Agency for Research on  
361 Cancer/World Health Organization. Full consortium acknowledgements for MVP and the  
362 ILCCO OncoArray study<sup>7</sup> are provided in Supplementary Information.

363

364 **Subject terms and techniques**

365 Biological sciences > Cancer > Lung cancer

366 Biological sciences > Genetics > Genetic association study > Genome-wide association  
367 studies



368 **Data Availability**

369 The full summary level association data from the individual population analyses in MVP  
370 will be available upon publication via the dbGaP study accession number phs001672.

371

372 **Competing interests**

373 S.-G.J. is an employee and shareholder of BridgeBio Pharma. The other authors  
374 declare no competing interests.

## 375 **Methods**

### 376 *Cohort definition*

377 Patients were identified from MVP participants<sup>19</sup> utilizing clinical information  
378 available through the United States Department of Veterans Affairs (VA) Corporate Data  
379 Warehouse (CDW) with ICD codes for primary lung cancer. Occurrences of the ICD-9  
380 codes 162.3, 162.4, 162.5, 162.8, and 162.9 or the ICD-10 codes C34.10, C34.11,  
381 C34.12, C34.2, C34.30, C34.31, C34.32, C34.80, C34.81, C34.82, C34.90, C34.91, and  
382 C34.92 were used in case identification. Patients with secondary lung cancer were  
383 excluded from the cohort using ICD-9/10 codes 197.x, C78.00, C78.01, and C78.02.  
384 Additional patients were identified in the VA Cancer Registry using ICD-O site, including  
385 lung/bronchus, other respiratory system or intrathoracic organs, or trachea. The Cancer  
386 Registry was also used to determine the lung cancer subtypes LUAD and LUSC among  
387 cases.

388 Preliminary totals of 18,633 and 10,845 patients with MVP participation were  
389 identified from the VA CDW and Cancer Registry, respectively. A combined cohort of  
390 20,631 unique patients was generated for further analysis. The cohort was  
391 predominantly male (~95%) with a median age of 64–68 for sub-cohorts, depending on  
392 ancestry assignments and cancer subtypes. The cohort was curated further to remove  
393 any participant with missing data. The final cohorts are described in Supplementary  
394 Data 1.

395 Once patients were identified from VA's CDW and Cancer Registry, cases were  
396 used to gather records related to age, sex, smoking status, and ancestry. Smoking  
397 status included former, current, and never, based on the MVP survey at the time of

398 enrollment and on electronic medical records. Ancestry was defined using a machine  
399 learning algorithm that harmonizes self-reported ethnicity and genetic ancestry  
400 (HARE)<sup>61</sup>. All analyses described here were performed on patients of EA or AA ancestry  
401 in ancestry-stratified cohorts. Additionally, the cohorts were further stratified by lung  
402 cancer subtypes for analysis. Matched controls were selected based on age, gender,  
403 smoking status, and HARE assignments. Age was binned into 5-year intervals for this  
404 purpose.

#### 405 *Array genotyping, genotype quality control, and principal component analysis*

406 Genotyping and quality control were conducted as described previously<sup>62</sup>. Briefly,  
407 we removed all samples with excess heterozygosity ( $F$  statistic  $< -0.1$ ), excess  
408 relatedness (kinship coefficient  $\geq 0.1$  with 7 or more MVP samples), and samples with  
409 call rates  $< 98.5\%$ . Additional samples with a mismatch between self-reported sex and  
410 genetic sex were removed.

411 Principal component (PC) analysis was conducted using PLINK 2.0<sup>63</sup>  
412 (v2.00a3LM), on a pruned set of SNPs (window size 1Mb, step size 80,  $r^2 < 0.1$ , minor  
413 allele frequency (MAF)  $< 0.01$ , Hardy-Weinberg equilibrium  $P < 1 \times 10^{-10}$ , missingness  
414 rate  $< 10\%$ ) within European ancestry (EA) and African ancestry (AA) on unrelated  
415 individuals, where unrelated individuals were defined as greater than third-degree  
416 relatives as previously described<sup>62</sup>. PCs were then projected onto related individuals in  
417 EA.

#### 418 *Imputation*

419 Prior to imputation, a within-cohort pre-phasing procedure was applied across the  
420 whole cohort by chromosome using Eagle2<sup>64</sup>. Imputation was then conducted on pre-

421 phased genotypes using Minimac4<sup>65</sup> and the 1000 Genomes Phase 3 (v5) reference  
422 panel<sup>66</sup> in 20Mb chunks and 3Mb flanking regions. Quality of imputation (Minimac Rsq  
423 or INFO) was then re-computed in EA and AA separately to be used as filters for  
424 respective GWAS. Imputed loci reaching genome-wide significance were tested for  
425 deviation from Hardy-Weinberg equilibrium (HWE) in 61,538 EA controls  
426 (Supplementary Data 23). Of the 93 conditionally independent SNPs across the GWAS  
427 analyses, 6 SNPs had a significant ( $P < 1 \times 10^{-6}$ ) HWE signal; unsurprisingly, the  
428 strongest HWE signal was from SNPs in the Major Histocompatibility Complex region.  
429 However, none of the 12 novel loci reported in Table 1 significantly deviated from HWE.

#### 430 *Association analyses*

431 For the EA lung cancer overall and subtype GWAS, we performed standard  
432 logistic regression using PLINK 2.0 (v2.00a2LM)<sup>63</sup> with a matched control design. EA  
433 GWAS was performed in unrelated individuals, defined as greater than third-degree  
434 relatives. For the AA lung cancer overall and subtype analyses, because the case  
435 numbers were smaller, we performed a mixed-model logistic regression using  
436 REGENIE (v1.0.6.7)<sup>67</sup>; REGENIE applies a whole genome regression model to control  
437 for relatedness and population structure, and includes a Firth correction to control for  
438 bias in rare SNPs as well as case-control imbalance. GWAS covariates for each  
439 ancestry included age, age-squared, sex, and smoking status as a categorical variable  
440 (current, former, never), and the first ten principal components. Participants with missing  
441 smoking status (n=786) were removed.

442 *EA meta-analysis*

443 We performed inverse-variance weighted meta-analyses of MVP-EA summary  
444 statistics and summary statistics previously reported by ILCCO<sup>7</sup> using METAL  
445 (v20100505)<sup>68</sup> with scheme STDERR. Significant inflation across GWAS and meta-  
446 analyses was not observed (all genomic control values ( $\lambda$ ) for GWAS in this study  
447  $\leq 1.15$ ). Only variants present in both studies were meta-analyzed. We further performed  
448 a sensitivity analysis using the Han-Eskin random effects model (RE2) in METASOFT  
449 v2.0.1<sup>33</sup>.

450 *Lung eQTL consortium*

451 The lung tissues used for eQTL analyses were from human subjects who  
452 underwent lung surgery at three academic sites: Laval University, University of British  
453 Columbia (UBC), and University of Groningen. Genotyping was carried out using the  
454 Illumina Human1M-Duo BeadChip. Expression profiling was performed using an  
455 Affymetrix custom array (see GEO platform GPL10379). Only samples that passed  
456 genotyping and gene expression quality controls were considered for eQTL analysis,  
457 leaving sample sizes of 409 for Laval, 287 for UBC, and 342 for Groningen. Within each  
458 set, genotypes were imputed in each cohort with the Michigan Imputation Server<sup>65</sup> using  
459 the Haplotype Reference Consortium<sup>69</sup> version 1 (HRC.r1-1) data as a reference set,  
460 and gene expression values were adjusted for age, sex, and smoking status.  
461 Normalized gene expression values from each set were then combined with ComBat<sup>70</sup>.  
462 eQTLs were calculated using a linear regression model and additive genotype effects  
463 as implemented in the Matrix eQTL package in R<sup>71</sup>. Cis-eQTLs were defined by a 2 Mb  
464 window, i.e., 1 Mb distance on either side of lung cancer-associated SNPs. Pre-

465 computed lung eQTLs were also obtained from the Genotype-Tissue Expression  
466 (GTEx) Portal<sup>20</sup>. Lung eQTLs in GTEx (version 8) are based on 515 individuals and  
467 calculated using FastQTL<sup>72</sup>.

#### 468 *Fine-mapping*

469 We performed Bayesian fine-mapping the genome-wide significant loci from EA  
470 meta-analysis and AA using the FinnGen fine-mapping pipeline<sup>73</sup>  
471 (<https://github.com/FINNGEN/finemapping-pipeline>) and SuSiE<sup>25,26</sup>. Pairwise SNP  
472 correlations were calculated directly from imputed dosages on European-ancestry MVP  
473 samples from this analysis using LDSTORE 2.0<sup>73</sup>. The maximum number of allowed  
474 causal SNPs at each locus was set to 10. Fine-mapping regions which overlapped the  
475 major histocompatibility complex (MHC; chr6:25,000,000-34,000,000) were excluded.  
476 High quality credible sets were defined as those with minimum  $r^2 < 0.5$  between variants.  
477 The functional consequences of the AA credible set variants were annotated using the  
478 Variant Effect Predictor (VEP)<sup>31</sup>.

#### 479 *Replication analysis*

480 External replication was performed for all genome-wide significant associations in  
481 overall lung cancer, LUAD, and LUSC in OncoArray Consortium Lung Study  
482 (OncoArray)<sup>8,74</sup>. Replication for genome-wide significant multi-ancestry associations  
483 was performed in a fixed effects meta-analysis of OncoArray CEU Europeans for  
484 significant EA meta-analysis associations, and in an YRI AA meta-analysis composed of  
485 5 studies<sup>8</sup> for significant MVP AA associations. Meta-analysis associations from this  
486 study were replicated against a meta-analysis of these OncoArray groups. To replicate  
487 significant variants from EA analysis conditioned on smoking, pack-years was

488 additionally included as a covariate in replication cohorts. There was no participant  
489 overlap between the replication cohorts and the ILCCO study<sup>7</sup> used in the discovery  
490 scan. Covariates included the first five genetic principal components and participant  
491 study sites. Proxy SNPs were used to replicate known associations at rs75675343  
492 (rs2318539/4:67831628:C:A;  $R^2_{EUR}=1$ ) and rs4586884 (rs4435699/4:164019500:C:G;  
493  $R^2_{EUR}=0.999$ ).

494

#### 495 *Multi-ancestry meta-analysis*

496 A multi-ancestry meta-analysis of MVP EA and AA cohorts with summary  
497 statistics previously reported by ILCCO<sup>7</sup> was conducted in METAL<sup>68</sup> using an inverse  
498 variance-weighted fixed effects scheme. Only variants present in two or more cohorts  
499 were meta-analyzed. Index variants were defined using the two-stage “clumping”  
500 procedure implemented in the Functional Mapping and Annotation (FUMA) platform<sup>75</sup>.  
501 In this process, genome-wide significant variants are collapsed into LD blocks ( $r^2>0.6$ )  
502 and subsequently re-clumped to yield approximately independent ( $r^2<0.1$ ) signals;  
503 adjacent signals separated by <250kb are ligated to form independent loci. Novel  
504 variants are defined as meta-analysis index variants located >1Mb from previously  
505 reported lung cancer associations. We additionally performed a sensitivity analysis  
506 using the random effects model (RE2) in METASOFT v2.0.1<sup>33</sup>.

#### 507 *Polygenic risk score (PRS) calculation*

508 We used PRS-CS<sup>76</sup> to generate effect size estimates under a Bayesian  
509 shrinkage framework, and then used PLINK 2.0 (v2.00a3LM)<sup>63</sup> to linearly combine  
510 weights into a risk score using a global shrinkage prior of  $1\times 10^{-4}$ , which is

511 recommended for less polygenic traits. Finally, scores were normalized to a mean of 0  
512 and a standard deviation of 1.

### 513 *Multi-trait analyses*

514 In order to remove all residual effects of smoking on lung cancer susceptibility,  
515 we conducted a multi-trait meta-analysis<sup>35</sup> conditioned on cigarettes per day, which was  
516 shown to be most significantly correlated with all lung cancer GWAS<sup>34</sup>. The meta-  
517 analysis was performed on the EA meta-analysis summary statistics using mtCOJO,  
518 part of the GCTA software package<sup>77</sup>. An LD reference was constructed from 50,000  
519 MVP EA samples.

520 Multi-trait analysis of GWAS (MTAG)<sup>45</sup> (v0.9.0) was applied using genome-wide  
521 LUSC summary statistics after conditioning on cigarettes per day, and estrogen  
522 receptor negative (ER-) breast cancer summary statistics<sup>46</sup> which were munged using  
523 LDSC (v1.01)<sup>38</sup>. Single causal variant colocalization between LUSC conditioned on  
524 cigarettes per day and ER- breast cancer was performed using Coloc (R; version 4)<sup>78</sup>  
525 for variants at *ABHD8* (chr19: 17,350,000 to 17,475,000). A posterior probability > 0.9  
526 for Hypothesis 4 (both traits are associated and share a single causal variant) was used  
527 as the criteria for colocalization.

### 528 *Heritability and genetic correlations*

529 Linkage Disequilibrium score regression (LDSC) v1.0.1 was used to calculate  
530 observed-scale SNP-heritability<sup>38</sup> using lung cancer and subtypes summary statistics,  
531 before and after conditioning on cigarettes per day. Pairwise genetic correlations were  
532 estimated between lung cancer and subtypes from MVP, ILCCO<sup>7</sup>, and EA meta-



533 analysis, and four smoking traits (smoking initiation, cigarettes per day, smoking  
534 cessation, and age of initiation)<sup>34</sup>.

#### 535 *Conditional and joint SNP analysis*

536 To find independently associated genome-wide significant SNPs at each locus in  
537 a stepwise fashion, we used GCTA-COJO using the --cojo-slct option. An LD reference  
538 was constructed from 50,000 MVP EA samples. Variants with MAF<0.01 in the COJO  
539 reference panel were not included in identification of independent signals. LDTrait<sup>79</sup> was  
540 queried to identify previously published significant GWAS variants within 1Mb of our  
541 index variants in all populations. Novel loci were defined as those at which the index  
542 variant was not within  $\pm 500$  kb of previously reported genome-wide significant lead  
543 SNPs for lung cancer or its subtypes in any ancestry.

#### 544 *Phenome-wide association study (PheWAS)*

545 We conducted a PheWAS of electronic health record-derived phenotypes and lab  
546 results in EA subjects using either the normalized PRS as the predictor or  
547 independently associated genome-wide significant SNPs. Comparison of unconditioned  
548 PRS PheWAS and conditioned PRS PheWAS were based on ILCCO summary  
549 statistics<sup>7</sup> and used MVP EA as the out-of-sample test set. Associations were tested  
550 using the R PheWAS package<sup>80</sup> version 0.1 with QC procedures described previously<sup>81</sup>.  
551 Control and sex-based exclusion criteria were applied.

## Main Tables

**Table 1:** Novel genome-wide significant loci and their respective index variants associated with lung cancer risk in European-ancestry meta-analyses from MVP and ILCCO<sup>7</sup> cohorts, MVP African ancestry, multi-ancestry meta-analyses, and in European-ancestry meta-analyses after conditioning on cigarettes per day. LUAD, adenocarcinoma; LUSC, squamous cell carcinoma; EA, effect allele; NEA, non-effect allele; EAF, effect allele frequency in the given population; OR (95% CI), odds ratio and 95% confidence interval.

| Lung cancer subtype                                                                                                 | rsID        | Cytoband | Position (hg19) | Candidate gene   | EA | NEA | EAF  | Discovery OR (95% CI) | Discovery <i>P</i>     | Replication OR (95% CI) | Replication <i>P</i>  | Combined meta-analysis OR (95% CI) | Combined meta-analysis <i>P</i> |
|---------------------------------------------------------------------------------------------------------------------|-------------|----------|-----------------|------------------|----|-----|------|-----------------------|------------------------|-------------------------|-----------------------|------------------------------------|---------------------------------|
| <b>Novel loci from the European ancestry GWAS meta-analysis</b>                                                     |             |          |                 |                  |    |     |      |                       |                        |                         |                       |                                    |                                 |
| Overall                                                                                                             | rs77045810  | 1q24.2   | 168,505,017     | <i>XCL2</i>      | A  | C   | 0.89 | 1.10 (1.07, 1.13)     | 1.43×10 <sup>-10</sup> | 1.07 (1.02, 1.13)       | 0.0057                | 1.09 (1.07, 1.12)                  | 3.94×10 <sup>-12</sup>          |
| Overall                                                                                                             | rs144840030 | 3q13.31  | 117,147,326     | <i>LSAMP</i>     | T  | G   | 0.01 | 1.31 (1.19, 1.44)     | 1.09×10 <sup>-8</sup>  | 1.07 (0.88, 1.30)       | 0.49                  | 1.26 (1.16, 1.37)                  | 5.01×10 <sup>-8</sup>           |
| Overall                                                                                                             | rs62400619  | 5q33.1   | 152,343,053     | <i>NMUR2</i>     | T  | C   | 0.68 | 1.06 (1.04, 1.08)     | 6.33×10 <sup>-9</sup>  | 1.03 (0.99, 1.06)       | 0.16                  | 1.05 (1.03, 1.07)                  | 1.10×10 <sup>-8</sup>           |
| Overall                                                                                                             | rs9988980   | 12p13.33 | 3,038,917       | <i>TULP3</i>     | T  | C   | 0.39 | 1.05 (1.04, 1.08)     | 5.34×10 <sup>-8</sup>  | 1.05 (1.02, 1.09)       | 0.0022                | 1.05 (1.04, 1.07)                  | 3.72×10 <sup>-10</sup>          |
| LUAD                                                                                                                | rs67824503  | 8q24.21  | 129,535,264     | <i>MYC</i>       | T  | C   | 0.75 | 1.10 (1.07, 1.14)     | 1.81×10 <sup>-8</sup>  | 1.11 (1.05, 1.16)       | 5.05×10 <sup>-5</sup> | 1.10 (1.07, 1.14)                  | 4.09×10 <sup>-12</sup>          |
| LUAD                                                                                                                | rs11855650  | 15q23    | 70,431,773      | <i>TLE3</i>      | T  | G   | 0.38 | 1.09 (1.06, 1.12)     | 1.12×10 <sup>-8</sup>  | 1.12 (1.07, 1.17)       | 1.22×10 <sup>-7</sup> | 1.10 (1.07, 1.13)                  | 1.15×10 <sup>-14</sup>          |
| LUSC                                                                                                                | rs36229791  | 10q24.31 | 101,991,135     | <i>BLOC1S2</i>   | A  | T   | 0.04 | 1.27 (1.17, 1.38)     | 4.04×10 <sup>-8</sup>  | 1.25 (1.12, 1.41)       | 1.49×10 <sup>-4</sup> | 1.26 (1.18, 1.35)                  | 2.48×10 <sup>-11</sup>          |
| <b>Novel loci from the African ancestry GWAS</b>                                                                    |             |          |                 |                  |    |     |      |                       |                        |                         |                       |                                    |                                 |
| Overall                                                                                                             | rs78994068  | 12q24.32 | 127,225,803     | <i>LINC00944</i> | C  | A   | 0.01 | 2.13 (1.66, 2.72)     | 1.87×10 <sup>-9</sup>  | 1.026 (0.681, 1.548)    | 0.90                  | 1.76 (1.42, 2.17)                  | 1.81×10 <sup>-7</sup>           |
| <b>Novel loci from the multi-ancestry meta-analysis (not genome-wide significant in the European meta-analysis)</b> |             |          |                 |                  |    |     |      |                       |                        |                         |                       |                                    |                                 |
| Overall                                                                                                             | rs329122    | 5q31.1   | 133,864,599     | <i>JADE2</i>     | A  | G   | 0.43 | 0.95 (0.93, 0.97)     | 1.12×10 <sup>-8</sup>  | 0.97 (0.94, 1.00)       | 0.053                 | 0.96 (0.94, 0.97)                  | 3.69×10 <sup>-9</sup>           |
| Overall                                                                                                             | rs7300571   | 12q13.11 | 47,857,826      | <i>RPAP3</i>     | T  | C   | 0.11 | 1.08 (1.05, 1.12)     | 3.47×10 <sup>-8</sup>  | 1.07 (1.02, 1.13)       | 0.0044                | 1.08 (1.06, 1.11)                  | 6.48×10 <sup>-10</sup>          |
| <b>Novel loci after conditioning on cigarettes per day from the European ancestry GWAS meta-analysis</b>            |             |          |                 |                  |    |     |      |                       |                        |                         |                       |                                    |                                 |
| Overall                                                                                                             | rs1124241   | 6q16.1   | 97,722,453      | <i>MMS22L</i>    | A  | G   | 0.22 | 1.08 (1.05, 1.11)     | 1.26×10 <sup>-8</sup>  | 1.06 (1.02, 1.11)       | 0.0062                | 1.08 (1.05, 1.10)                  | 3.39×10 <sup>-10</sup>          |
| LUSC                                                                                                                | rs61494113  | 19p13.11 | 17,401,859      | <i>ABHD8</i>     | A  | G   | 0.29 | 1.12 (1.07, 1.16)     | 4.90×10 <sup>-8</sup>  | 1.10 (1.03, 1.17)       | 0.0031                | 1.11 (1.08, 1.15)                  | 6.39×10 <sup>-10</sup>          |

## 560 **Main Figure captions**

561 **Figure 1. Highlighted novel GWAS loci. a-d)** The meta-analysis of squamous cell  
562 lung carcinoma (LUSC) in European ancestry (EA) identifies a novel locus at 10q24.31.  
563 **a)** Odds ratios for rs36229791 in LUSC compared to lung adenocarcinoma (LUAD) and  
564 overall lung cancer. **b)** *BLOC1S2* expression varies by genotype at rs36229791. **c)**  
565 *BLOC1S2* eQTL t statistic vs LUSC z statistic. **d)** Regional association plot showing  
566 SNP significance and genes around lead SNP rs36229791. **e)** The African ancestry  
567 GWAS highlights a putatively novel locus on chr12 at *LINC00944*. The risk allele has  
568 effectively 0% frequency in EA.

569  
570 **Figure 2. Association of lung cancer GWAS with smoking behaviors. a)** Genetic  
571 correlations (with 95% confidence interval) between the lung cancer GWAS and  
572 smoking behaviors, including smoking initiation, cigarettes per day, smoking cessation,  
573 and age of initiation. **b)** SNP heritability for the meta-analysis and conditional meta-  
574 analysis. The heritability decreases in the conditional analysis for overall lung cancer as  
575 well as both subtypes, suggesting that some portion of the heritability of lung cancer is  
576 due to smoking behavior. **c)** Polygenic risk scores (PRS) based on standard lung  
577 cancer GWAS (blue) performs worse in never-smokers than former or current smokers,  
578 while conditioning on smoking behavior (orange) results in similar performance.

579  
580 **Figure 3. Forest plot of genome-wide significant associations.** Within each cancer  
581 subtype, changes in effect size and significance are shown before and after conditioning

582 on cigarettes per day. Novel loci are indicated by an asterisk after the gene name (\*).  
583 Loci that became significant after conditioning ( $P < 5 \times 10^{-8}$ ) are in red.

584

585 **Figure 4. Significant locus after conditioning on smoking behavior, 19p13.11, has**  
586 **pleiotropic associations with ER-negative breast cancer. a)** Regional association  
587 plot of the 19p13.11 multi-trait analysis of GWAS (MTAG) locus. **b)** Odds ratios for lead  
588 SNP rs61494113 in squamous cell lung carcinoma (LUSC), before and after  
589 conditioning, and MTAG analysis, compared to lung adenocarcinoma and overall lung  
590 cancer. **c)** *ABHD8* expression varies by genotype at rs61494113. **d)** *ABHD8* eQTL t  
591 statistic vs LUSC z statistic; red X's indicate the 95% credible set.

592

593 **Figure 5. Phenome-wide association study (PheWAS) of polygenic risk scores**  
594 **(PRS) of lung cancer and lung cancer conditioned on cigarettes per day. a)**  
595 PheWAS of PRS on lung cancer is mostly confounded with smoking associations. **b)**  
596 PheWAS of the conditional meta-analysis PRS shows associations with skin cancer and  
597 metabolic traits.

598 **Supplementary Figure captions**

599

600 **Supplementary Fig. 1. Study overview.** Genome-wide association studies were  
601 performed in Million Veteran Program (MVP) European and African ancestry (AA)  
602 cohorts for overall lung cancer, adenocarcinoma, and squamous cell carcinoma. MVP  
603 and International Lung Cancer Consortium OncoArray (ILCCO) European cohorts were  
604 meta-analyzed, and further meta-analyzed with AA for multi-ancestry meta-analysis.  
605 Multi-trait conditional meta-analysis was performed on EA using average cigarettes per  
606 day from Liu et al. (2019). Replication and combined meta-analysis was performed  
607 using external OncoArray cohorts.

608

609 **Supplementary Fig. 2. Manhattan plots and quantile-quantile (QQ) plots for**  
610 **European meta-analyses.** Manhattan and QQ plots are shown for **a)** overall lung  
611 cancer; **b)** lung adenocarcinoma (LUAD); and **c)** squamous cell lung carcinoma (LUSC).  
612 Cytoband positions for significant loci are noted in each Manhattan plot; putatively novel  
613 loci identified in this study are in red; externally replicated novel loci are indicated by a  
614 box. Genomic control ( $\lambda$ ) values, LDSC intercepts, and sample sizes are inset in QQ  
615 plots.

616

617 **Supplementary Fig. 3. Effect allele frequency concordance between International**  
618 **Lung Cancer Consortium OncoArray (ILCCO) and Million Veteran Program**  
619 **European ancestry (EA) GWAS. (a-c)** Effect allele frequency concordance for all  
620 variants tested in both studies with  $P < 1 \times 10^{-5}$  in ILCCO for **a)** overall lung cancer, **b)**

621 lung adenocarcinoma, and **c**) squamous cell lung carcinoma. Points are styled based  
622 on significance level in MVP. **(d-f)** Effect size concordance for genome-wide significant  
623 variants in **d)** overall lung cancer, **e)** lung adenocarcinoma, and **f)** squamous cell lung  
624 carcinoma. One-to-one concordance is shown as a dashed line. Index variants from the  
625 EA meta-analysis between ILCCO and MVP are annotated by locus. Novel significant  
626 loci after meta-analysis are annotated in red.

627

628 **Supplementary Fig. 4. Genome-wide significant novel lung cancer loci.** Forest  
629 plots (left) and regional Manhattan plots (right) for novel loci from European meta-  
630 analysis: **a)** *XCL2*, **b)** *LSAMP*, **c)** *NMUR2*, **d)** *TUPL3*, **e)** *MYC*, **f)** *TLE3*, and **g)**  
631 *BLOC1S2*; and from multi-ancestry meta-analysis: **h)** *JADE2*; **i)** *RPAP3*.

632

633 **Supplementary Fig. 5. Manhattan plots and quantile-quantile (QQ) plots for MVP**  
634 **African ancestry.** Manhattan and QQ plots are shown for **a)** African ancestry overall  
635 lung cancer; **b)** lung adenocarcinoma (LUAD); and **c)** squamous cell lung carcinoma  
636 (LUSC). Cytoband positions for significant loci are noted in each Manhattan plot;  
637 putatively novel loci identified in this study are in red. Genomic control ( $\lambda$ ) values and  
638 sample sizes are inset in QQ plots.

639

640 **Supplementary Fig. 6. Manhattan plots and quantile-quantile (QQ) plots for multi-**  
641 **ancestry meta-analyses.** Manhattan and QQ plots are shown for **a)** the multi-ancestry  
642 meta-analysis in overall lung cancer; **b)** lung adenocarcinoma (LUAD); and **c)**  
643 squamous cell lung carcinoma (LUSC). Cytoband positions for significant loci are noted

644 in each Manhattan plot; novel loci not identified in the European meta-analysis are in  
645 red; externally replicated novel loci are indicated by a box. Genomic control ( $\lambda$ ) values  
646 and sample sizes are inset in QQ plots.

647

648 **Supplementary Fig. 7. Association of the lung cancer polygenic risk score (PRS)**  
649 **with lung cancer by smoking status. a)** Association of the lung cancer PRS with  
650 overall lung cancer risk. The risk of lung cancer reached an odds ratio (OR) of 2.51  
651 (95% confidence interval: 1.80, 3.51) in the top decile. **b)** Association of the lung cancer  
652 PRS with lung cancer risk in never-smokers. Among never-smokers, lung cancer risk  
653 reached an OR of 2.67 (2.40, 2.98) in the top decile. **c)** Association of the lung cancer  
654 PRS with lung cancer risk in ever-smokers with no history of lung cancer. The top PRS  
655 decile was associated with an OR of 1.25 (1.18, 1.32).

656

657 **Supplementary Fig. 8. Manhattan plots and quantile-quantile (QQ) plots for**  
658 **European meta-analyses conditioned on cigarettes per day.** Manhattan and QQ  
659 plots for **a)** overall lung cancer conditioned on cigarettes per day; **b)** lung  
660 adenocarcinoma (LUAD) conditioned on cigarettes per day; and **c)** squamous cell lung  
661 carcinoma (LUSC) conditioned on cigarettes per day. Cytoband positions for significant  
662 loci are noted in each Manhattan plot; novel loci not identified in the European meta-  
663 analysis are in red; externally replicated novel loci are indicated by a box. Genomic  
664 control ( $\lambda$ ) values, LDSC intercepts, and sample sizes are inset in QQ plots.

665

666 **Supplementary Fig. 9. Novel loci for overall lung cancer and squamous cell**  
667 **carcinoma conditioned on smoking.** Forest plots (left) and regional Manhattan plots  
668 (right) for novel loci identified in the European meta-analysis conditioned on cigarettes  
669 per day: a) *MMS22L* in overall lung cancer and b) *ABHD8* in squamous cell lung cancer.

670

671

672

673

674

675

676

677

678

679

680



## 681 **References**

- 682 1. Schabath, M. B. & Cote, M. L. Cancer Progress and Priorities: Lung Cancer. *Cancer*  
683 *Epidemiol. Biomarkers Prev.* **28**, 1563–1579 (2019).
- 684 2. Leiter, A., Veluswamy, R. R. & Wisnivesky, J. P. The global burden of lung cancer: current  
685 status and future trends. *Nat. Rev. Clin. Oncol.* **20**, 624–639 (2023).
- 686 3. Sung, H. *et al.* Global Cancer Statistics 2020: GLOBOCAN Estimates of Incidence and  
687 Mortality Worldwide for 36 Cancers in 185 Countries. *CA Cancer J. Clin.* **71**, 209–249  
688 (2021).
- 689 4. Siegel, R. L., Miller, K. D., Fuchs, H. E. & Jemal, A. Cancer statistics, 2022. *CA Cancer J.*  
690 *Clin.* **72**, 7–33 (2022).
- 691 5. Bossé, Y. & Amos, C. I. A Decade of GWAS Results in Lung Cancer. *Cancer Epidemiol.*  
692 *Biomarkers Prev.* **27**, 363–379 (2018).
- 693 6. Timofeeva, M. N. *et al.* Influence of common genetic variation on lung cancer risk: meta-  
694 analysis of 14 900 cases and 29 485 controls. *Hum. Mol. Genet.* **21**, 4980–4995 (2012).
- 695 7. McKay, J. D. *et al.* Large-scale association analysis identifies new lung cancer susceptibility  
696 loci and heterogeneity in genetic susceptibility across histological subtypes. *Nat. Genet.* **49**,  
697 1126–1132 (2017).
- 698 8. Byun, J. *et al.* Cross-ancestry genome-wide meta-analysis of 61,047 cases and 947,237  
699 controls identifies new susceptibility loci contributing to lung cancer. *Nat. Genet.* **54**, 1167–  
700 1177 (2022).
- 701 9. Wang, Y. *et al.* SNP rs17079281 decreases lung cancer risk through creating an YY1-  
702 binding site to suppress DCBLD1 expression. *Oncogene* **39**, 4092–4102 (2020).
- 703 10. Zhang, T. *et al.* Genomic and evolutionary classification of lung cancer in never smokers.  
704 *Nat. Genet.* **53**, 1348–1359 (2021).
- 705 11. Govindan, R. *et al.* Genomic landscape of non-small cell lung cancer in smokers and never-

- 706 smokers. *Cell* **150**, 1121–1134 (2012).
- 707 12. Wang, Z. *et al.* Meta-analysis of genome-wide association studies identifies multiple lung  
708 cancer susceptibility loci in never-smoking Asian women. *Hum. Mol. Genet.* **25**, 620–629  
709 (2016).
- 710 13. Schabath, M. B., Cress, D. & Munoz-Antonia, T. Racial and Ethnic Differences in the  
711 Epidemiology and Genomics of Lung Cancer. *Cancer Control* **23**, 338–346 (2016).
- 712 14. Long, E., Patel, H., Byun, J., Amos, C. I. & Choi, J. Functional studies of lung cancer  
713 GWAS beyond association. *Hum. Mol. Genet.* **31**, R22–R36 (2022).
- 714 15. Shi, J. *et al.* Genome-wide association study of lung adenocarcinoma in East Asia and  
715 comparison with a European population. *Nat. Commun.* **14**, 3043 (2023).
- 716 16. Dai, J. *et al.* Identification of risk loci and a polygenic risk score for lung cancer: a large-  
717 scale prospective cohort study in Chinese populations. *Lancet Respir Med* **7**, 881–891  
718 (2019).
- 719 17. Nahar, R. *et al.* Elucidating the genomic architecture of Asian EGFR-mutant lung  
720 adenocarcinoma through multi-region exome sequencing. *Nat. Commun.* **9**, 216 (2018).
- 721 18. Zanetti, K. A. *et al.* Genome-wide association study confirms lung cancer susceptibility loci  
722 on chromosomes 5p15 and 15q25 in an African-American population. *Lung Cancer* **98**, 33–  
723 42 (2016).
- 724 19. Gaziano, J. M. *et al.* Million Veteran Program: A mega-biobank to study genetic influences  
725 on health and disease. *J. Clin. Epidemiol.* **70**, 214–223 (2016).
- 726 20. GTEx Consortium. The GTEx Consortium atlas of genetic regulatory effects across human  
727 tissues. *Science* **369**, 1318–1330 (2020).
- 728 21. Hao, K. *et al.* Lung eQTLs to help reveal the molecular underpinnings of asthma. *PLoS*  
729 *Genet.* **8**, e1003029 (2012).
- 730 22. Bossé, Y. *et al.* Transcriptome-wide association study reveals candidate causal genes for  
731 lung cancer. *Int. J. Cancer* **146**, 1862–1878 (2020).

- 732 23. Koutsami, M. K. *et al.* Centrosome abnormalities are frequently observed in non-small-cell  
733 lung cancer and are associated with aneuploidy and cyclin E overexpression. *J. Pathol.*  
734 **209**, 512–521 (2006).
- 735 24. Chan, J. Y. A clinical overview of centrosome amplification in human cancers. *Int. J. Biol.*  
736 *Sci.* **7**, 1122–1144 (2011).
- 737 25. Wang, G., Sarkar, A., Carbonetto, P. & Stephens, M. A simple new approach to variable  
738 selection in regression, with application to genetic fine mapping. *J. R. Stat. Soc. Series B*  
739 *Stat. Methodol.* **82**, 1273–1300 (2020).
- 740 26. Zou, Y., Carbonetto, P., Wang, G. & Stephens, M. Fine-mapping from summary data with  
741 the ‘Sum of Single Effects’ model. *PLoS Genet.* **18**, e1010299 (2022).
- 742 27. de Goede, O. M. *et al.* Population-scale tissue transcriptomics maps long non-coding RNAs  
743 to complex disease. *Cell* **184**, 2633–2648.e19 (2021).
- 744 28. Li, Y. *et al.* Pan-cancer characterization of immune-related lncRNAs identifies potential  
745 oncogenic biomarkers. *Nat. Commun.* **11**, 1000 (2020).
- 746 29. de Santiago, P. R. *et al.* Immune-related lncRNA LINC00944 responds to variations in  
747 ADAR1 levels and it is associated with breast cancer prognosis. *Life Sci.* **268**, 118956  
748 (2021).
- 749 30. Chen, D. *et al.* Genome-wide analysis of long noncoding RNA (lncRNA) expression in  
750 colorectal cancer tissues from patients with liver metastasis. *Cancer Med.* **5**, 1629–1639  
751 (2016).
- 752 31. McLaren, W. *et al.* The Ensembl Variant Effect Predictor. *Genome Biol.* **17**, 122 (2016).
- 753 32. Saunders, G. R. B. *et al.* Genetic diversity fuels gene discovery for tobacco and alcohol  
754 use. *Nature* **612**, 720–724 (2022).
- 755 33. Han, B. & Eskin, E. Random-effects model aimed at discovering associations in meta-  
756 analysis of genome-wide association studies. *Am. J. Hum. Genet.* **88**, 586–598 (2011).
- 757 34. Liu, M. *et al.* Association studies of up to 1.2 million individuals yield new insights into the

- 758 genetic etiology of tobacco and alcohol use. *Nat. Genet.* **51**, 237–244 (2019).
- 759 35. Zhu, Z. *et al.* Causal associations between risk factors and common diseases inferred from  
760 GWAS summary data. *Nat. Commun.* **9**, 1–12 (2018).
- 761 36. Xue, A. *et al.* Genome-wide analyses of behavioural traits are subject to bias by misreports  
762 and longitudinal changes. *Nat. Commun.* **12**, 20211 (2021).
- 763 37. Munafò, M. R., Tilling, K., Taylor, A. E., Evans, D. M. & Davey Smith, G. Collider scope:  
764 when selection bias can substantially influence observed associations. *Int. J. Epidemiol.* **47**,  
765 226–235 (2018).
- 766 38. Bulik-Sullivan, B. K. *et al.* LD Score regression distinguishes confounding from polygenicity  
767 in genome-wide association studies. *Nat. Genet.* **47**, 291–295 (2015).
- 768 39. Nguyen, M.-H., Ueda, K., Nakamura, Y. & Daigo, Y. Identification of a novel oncogene,  
769 MMS22L, involved in lung and esophageal carcinogenesis. *Int. J. Oncol.* **41**, 1285–1296  
770 (2012).
- 771 40. Yang, W. *et al.* Deciphering associations between three RNA splicing-related genetic  
772 variants and lung cancer risk. *NPJ Precis Oncol* **6**, 48 (2022).
- 773 41. Gabriel, A. A. G. *et al.* Genetic Analysis of Lung Cancer and the Germline Impact on  
774 Somatic Mutation Burden. *J. Natl. Cancer Inst.* **114**, 1159–1166 (2022).
- 775 42. Lawrenson, K. *et al.* Functional mechanisms underlying pleiotropic risk alleles at the  
776 19p13.1 breast-ovarian cancer susceptibility locus. *Nat. Commun.* **7**, 12675 (2016).
- 777 43. Lesseur, C. *et al.* Genome-wide association meta-analysis identifies pleiotropic risk loci for  
778 aerodigestive squamous cell cancers. *PLoS Genet.* **17**, e1009254 (2021).
- 779 44. Fachal, L. *et al.* Fine-mapping of 150 breast cancer risk regions identifies 191 likely target  
780 genes. *Nat. Genet.* **52**, 56–73 (2020).
- 781 45. Turley, P. *et al.* Multi-trait analysis of genome-wide association summary statistics using  
782 MTAG. *Nat. Genet.* **50**, 229–237 (2018).
- 783 46. Michailidou, K. *et al.* Association analysis identifies 65 new breast cancer risk loci. *Nature*

- 784       **551**, 92–94 (2017).
- 785   47. Wallace, C. A more accurate method for colocalisation analysis allowing for multiple causal  
786       variants. *PLoS Genet.* **17**, e1009440 (2021).
- 787   48. Gusev, A. *et al.* A transcriptome-wide association study of high-grade serous epithelial  
788       ovarian cancer identifies new susceptibility genes and splice variants. *Nat. Genet.* **51**, 815–  
789       823 (2019).
- 790   49. Brenner, D. R. *et al.* Alcohol consumption and lung cancer risk: A pooled analysis from the  
791       International Lung Cancer Consortium and the SYNERGY study. *Cancer Epidemiol.* **58**,  
792       25–32 (2019).
- 793   50. Larsson, S. C. *et al.* Smoking, alcohol consumption, and cancer: A mendelian  
794       randomisation study in UK Biobank and international genetic consortia participants. *PLoS*  
795       *Med.* **17**, e1003178 (2020).
- 796   51. Petrelli, F. *et al.* Association of Obesity With Survival Outcomes in Patients With Cancer: A  
797       Systematic Review and Meta-analysis. *JAMA Netw Open* **4**, e213520 (2021).
- 798   52. Lan, T., Chen, L. & Wei, X. Inflammatory Cytokines in Cancer: Comprehensive  
799       Understanding and Clinical Progress in Gene Therapy. *Cells* **10**, (2021).
- 800   53. Kresse, S. H. *et al.* LSAMP, a novel candidate tumor suppressor gene in human  
801       osteosarcomas, identified by array comparative genomic hybridization. *Genes*  
802       *Chromosomes Cancer* **48**, 679–693 (2009).
- 803   54. Xie, J. *et al.* Copy number analysis identifies tumor suppressive lncRNAs in human  
804       osteosarcoma. *Int. J. Oncol.* **50**, 863–872 (2017).
- 805   55. Yu, G. *et al.* Roles of transducin-like enhancer of split (TLE) family proteins in  
806       tumorigenesis and immune regulation. *Front Cell Dev Biol* **10**, 1010639 (2022).
- 807   56. Sartor, I. T. S., Recamonde-Mendoza, M. & Ashton-Prolla, P. TULP3: A potential biomarker  
808       in colorectal cancer? *PLoS One* **14**, e0210762 (2019).
- 809   57. Chaudhary, P. K. & Kim, S. An Insight into GPCR and G-Proteins as Cancer Drivers. *Cells*

- 810 **10**, (2021).
- 811 58. Murphy, C. *et al.* An Analysis of JADE2 in Non-Small Cell Lung Cancer (NSCLC).  
812 *Biomedicines* **11**, (2023).
- 813 59. Ni, L. *et al.* RPAP3 interacts with Reptin to regulate UV-induced phosphorylation of H2AX  
814 and DNA damage. *J. Cell. Biochem.* **106**, 920–928 (2009).
- 815 60. Saredi, G. *et al.* H4K20me0 marks post-replicative chromatin and recruits the TONSL–  
816 MMS22L DNA repair complex. *Nature* **534**, 714–718 (2016).
- 817 61. Fang, H. *et al.* Harmonizing Genetic Ancestry and Self-identified Race/Ethnicity in Genome-  
818 wide Association Studies. *Am. J. Hum. Genet.* **105**, 763–772 (2019).
- 819 62. Hunter-Zinck, H. *et al.* Genotyping Array Design and Data Quality Control in the Million  
820 Veteran Program. *Am. J. Hum. Genet.* **106**, 535–548 (2020).
- 821 63. Chang, C. C. *et al.* Second-generation PLINK: rising to the challenge of larger and richer  
822 datasets. *Gigascience* **4**, 7 (2015).
- 823 64. Loh, P.-R. *et al.* Reference-based phasing using the Haplotype Reference Consortium  
824 panel. *Nat. Genet.* **48**, 1443–1448 (2016).
- 825 65. Das, S. *et al.* Next-generation genotype imputation service and methods. *Nat. Genet.* **48**,  
826 1284–1287 (2016).
- 827 66. 1000 Genomes Project Consortium *et al.* A global reference for human genetic variation.  
828 *Nature* **526**, 68–74 (2015).
- 829 67. Mbatchou, J. *et al.* Computationally efficient whole-genome regression for quantitative and  
830 binary traits. *Nat. Genet.* **53**, 1097–1103 (2021).
- 831 68. Willer, C. J., Li, Y. & Abecasis, G. R. METAL: fast and efficient meta-analysis of  
832 genomewide association scans. *Bioinformatics* **26**, 2190–2191 (2010).
- 833 69. McCarthy, S. *et al.* A reference panel of 64,976 haplotypes for genotype imputation. *Nat.*  
834 *Genet.* **48**, 1279–1283 (2016).
- 835 70. Johnson, W. E., Li, C. & Rabinovic, A. Adjusting batch effects in microarray expression data

- 836 using empirical Bayes methods. *Biostatistics* **8**, 118–127 (2007).
- 837 71. Shabalin, A. A. Matrix eQTL: ultra fast eQTL analysis via large matrix operations.  
838 *Bioinformatics* **28**, 1353–1358 (2012).
- 839 72. Ongen, H., Buil, A., Brown, A. A., Dermitzakis, E. T. & Delaneau, O. Fast and efficient QTL  
840 mapper for thousands of molecular phenotypes. *Bioinformatics* **32**, 1479–1485 (2016).
- 841 73. Benner, C. *et al.* FINEMAP: efficient variable selection using summary data from genome-  
842 wide association studies. *Bioinformatics* **32**, 1493–1501 (2016).
- 843 74. Amos, C. I. *et al.* The OncoArray Consortium: A Network for Understanding the Genetic  
844 Architecture of Common Cancers. *Cancer Epidemiol. Biomarkers Prev.* **26**, 126–135  
845 (2017).
- 846 75. Watanabe, K., Taskesen, E., van Bochoven, A. & Posthuma, D. Functional mapping and  
847 annotation of genetic associations with FUMA. *Nat. Commun.* **8**, 1826 (2017).
- 848 76. Ge, T., Chen, C.-Y., Ni, Y., Feng, Y.-C. A. & Smoller, J. W. Polygenic prediction via  
849 Bayesian regression and continuous shrinkage priors. *Nat. Commun.* **10**, 1776 (2019).
- 850 77. Yang, J., Lee, S. H., Goddard, M. E. & Visscher, P. M. GCTA: a tool for genome-wide  
851 complex trait analysis. *Am. J. Hum. Genet.* **88**, 76–82 (2011).
- 852 78. Giambartolomei, C. *et al.* Bayesian test for colocalisation between pairs of genetic  
853 association studies using summary statistics. *PLoS Genet.* **10**, e1004383 (2014).
- 854 79. Machiela, M. J. & Chanock, S. J. LDlink: a web-based application for exploring population-  
855 specific haplotype structure and linking correlated alleles of possible functional variants.  
856 *Bioinformatics* **31**, 3555–3557 (2015).
- 857 80. Carroll, R. J., Bastarache, L. & Denny, J. C. R PheWAS: data analysis and plotting tools for  
858 phenome-wide association studies in the R environment. *Bioinformatics* **30**, 2375–2376  
859 (2014).
- 860 81. Klarin, D. *et al.* Genetics of blood lipids among ~300,000 multi-ethnic participants of the  
861 Million Veteran Program. *Nat. Genet.* **50**, 1514–1523 (2018).

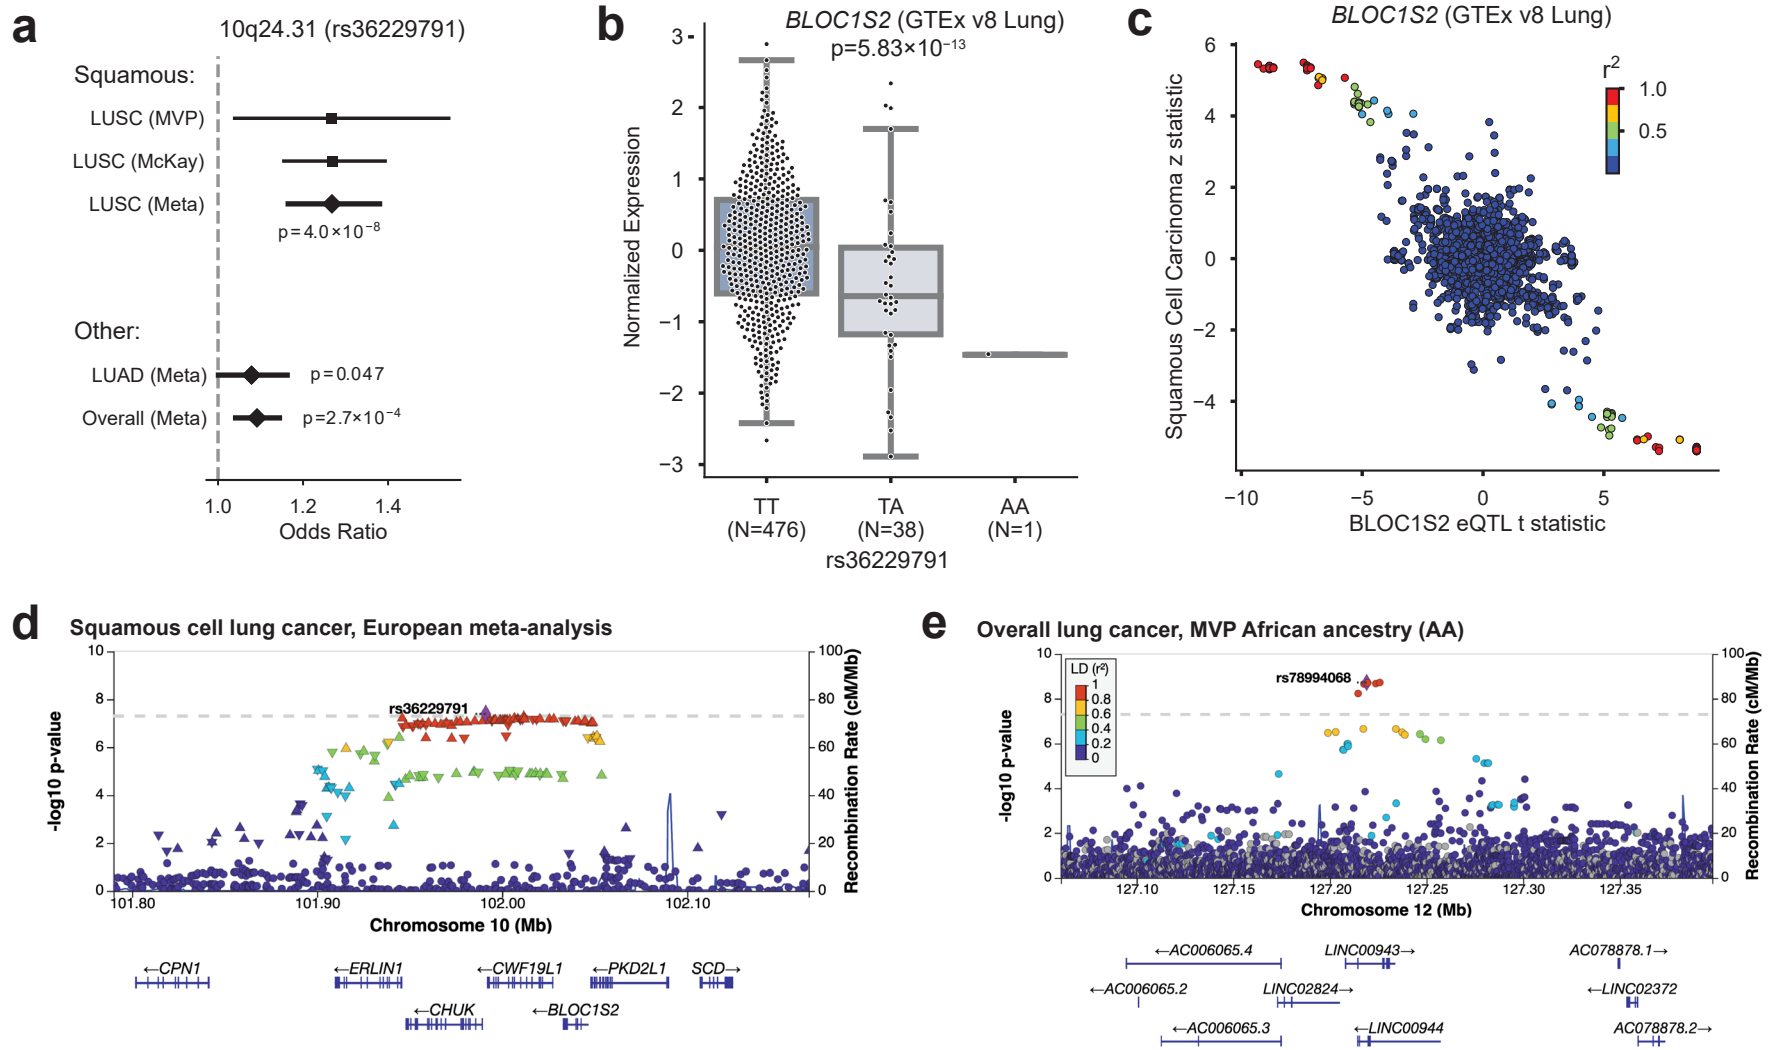

**Figure 1. Highlighted novel GWAS loci. a-d)** The meta-analysis of squamous cell lung carcinoma (LUSC) in European ancestry (EA) identifies a novel locus at 10q24.31. **a)** Odds ratios for rs36229791 in LUSC compared to lung adenocarcinoma (LUAD) and overall lung cancer. **b)** *BLOC1S2* expression varies by genotype at rs36229791. **c)** *BLOC1S2* eQTL t statistic vs LUSC z statistic. **d)** Regional association plot showing SNP significance and genes around lead SNP rs36229791. **e)** The African ancestry GWAS highlights a putatively novel locus on chr12 at *LINC00943/LINC00944*. The risk allele has effectively 0% frequency in EA.



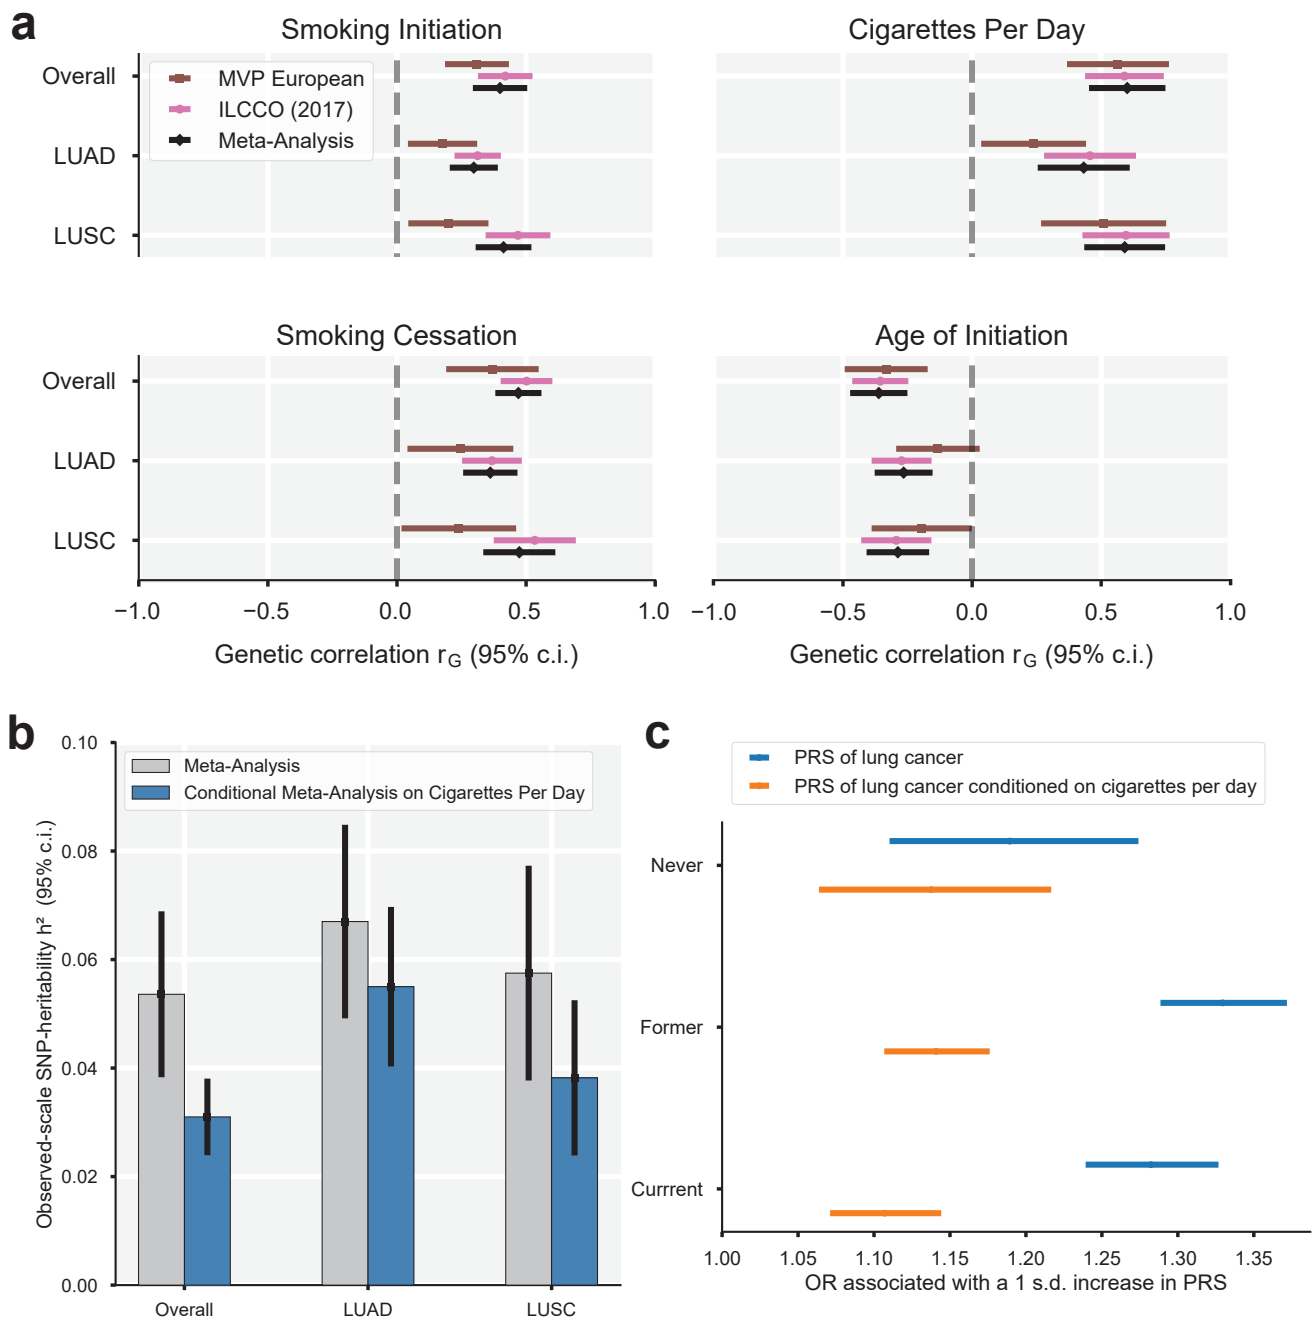

**Figure 2. Association of lung cancer GWAS with smoking behaviors.** **a)** Genetic correlations (with 95% confidence interval) between the lung cancer GWAS and smoking behaviors, including smoking initiation, cigarettes per day, smoking cessation, and age of initiation. **b)** SNP heritability for the meta-analysis and conditional meta-analysis. The heritability decreases in the conditional analysis for overall lung cancer as well as both subtypes, suggesting that some portion of the heritability of lung cancer is due to smoking behavior. **c)** Polygenic risk scores (PRS) based on standard lung cancer GWAS (blue) performs worse in never-smokers than former or current smokers, while conditioning on smoking behavior (orange) results in similar performance.

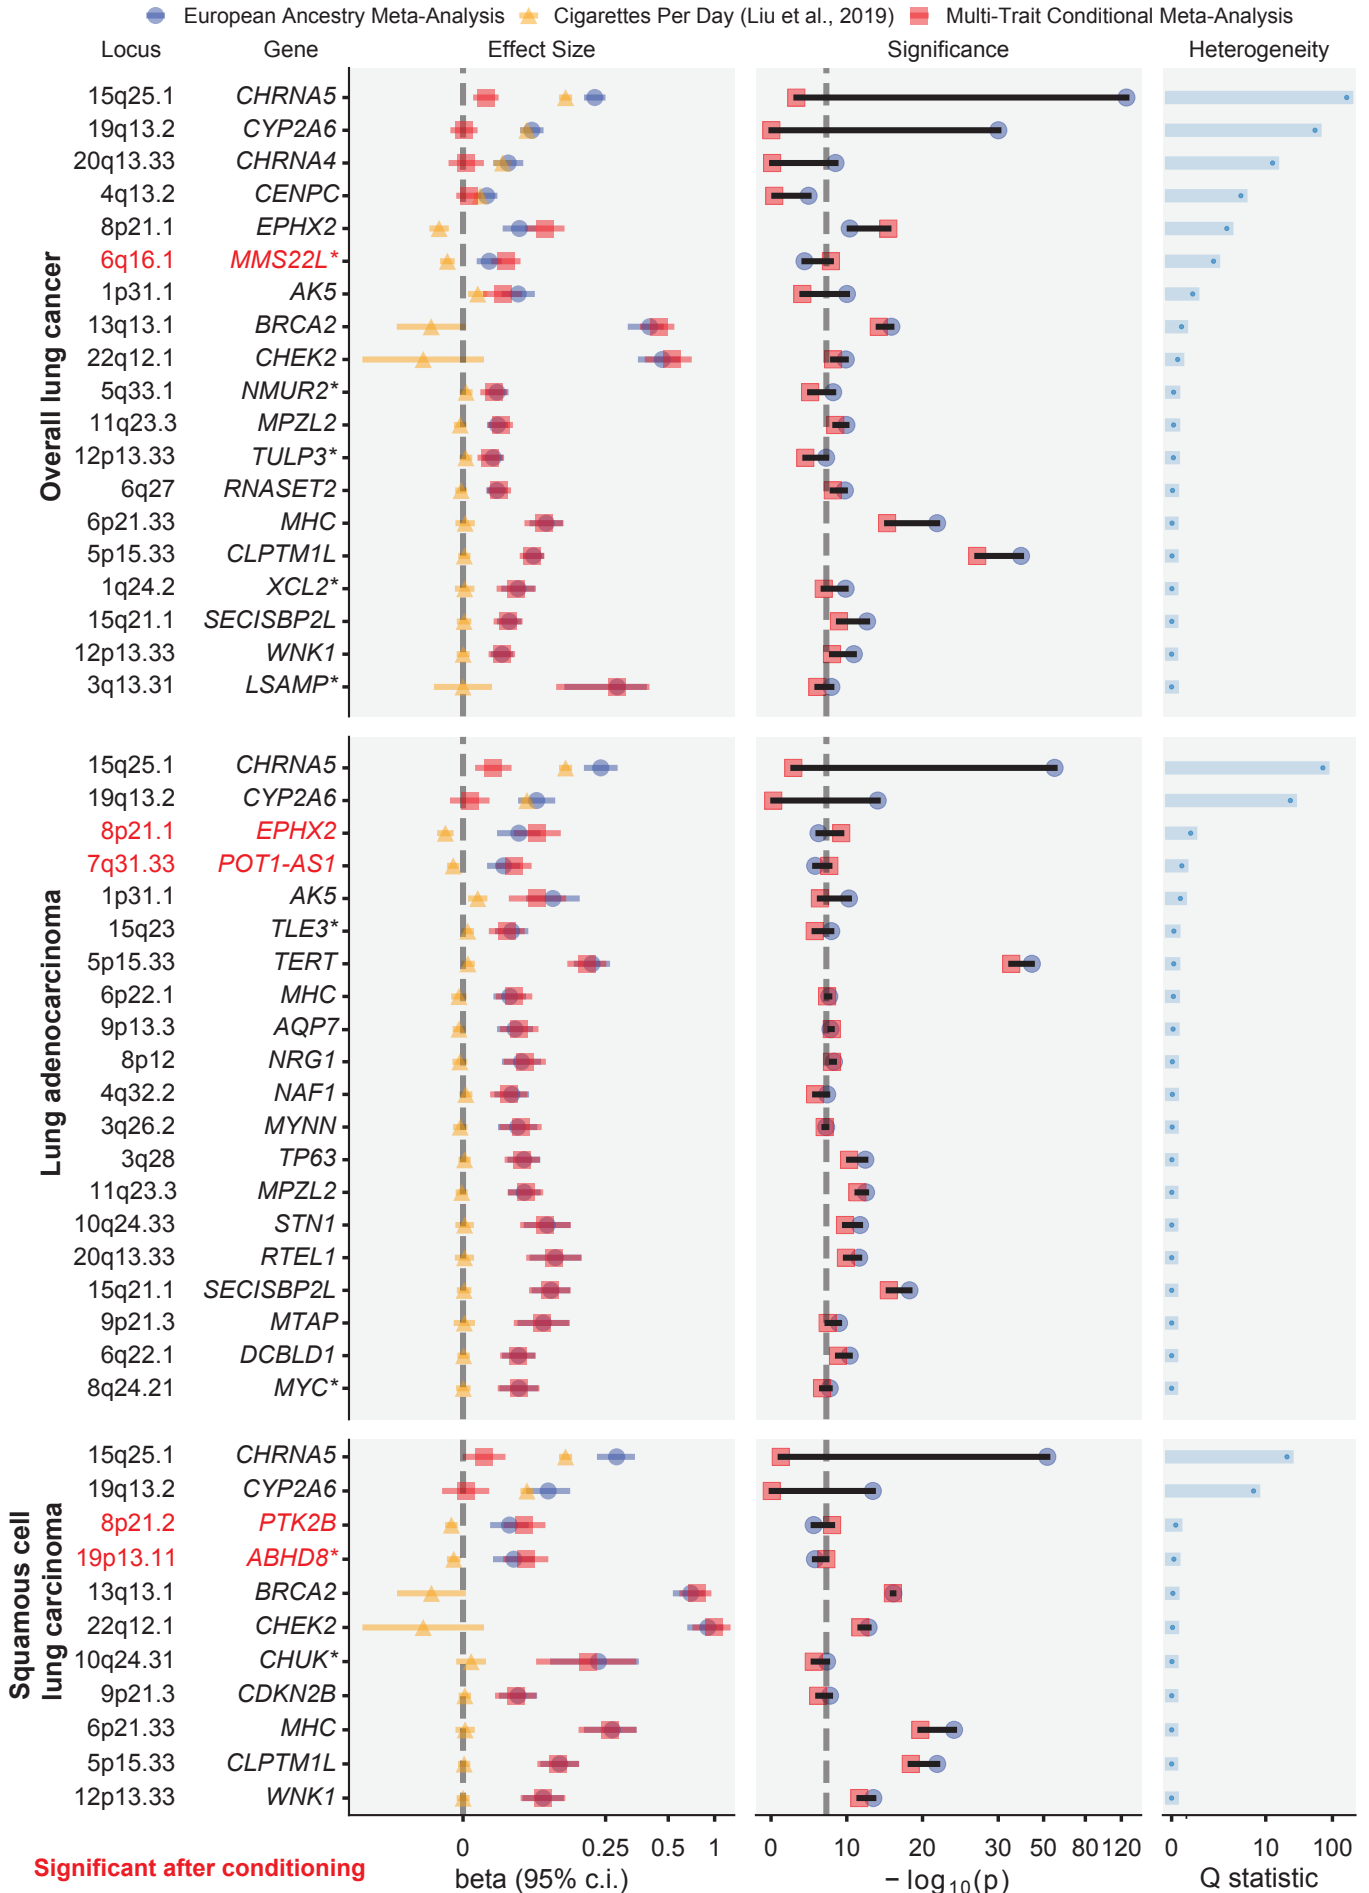

**Figure 3. Forest plot of genome-wide significant associations.** Within each cancer subtype, changes in effect size and significance are shown before and after conditioning on cigarettes per day. Novel loci are indicated by an asterisk after the gene name (\*). Loci that became significant after conditioning ( $P < 5 \times 10^{-8}$ ) are in red.

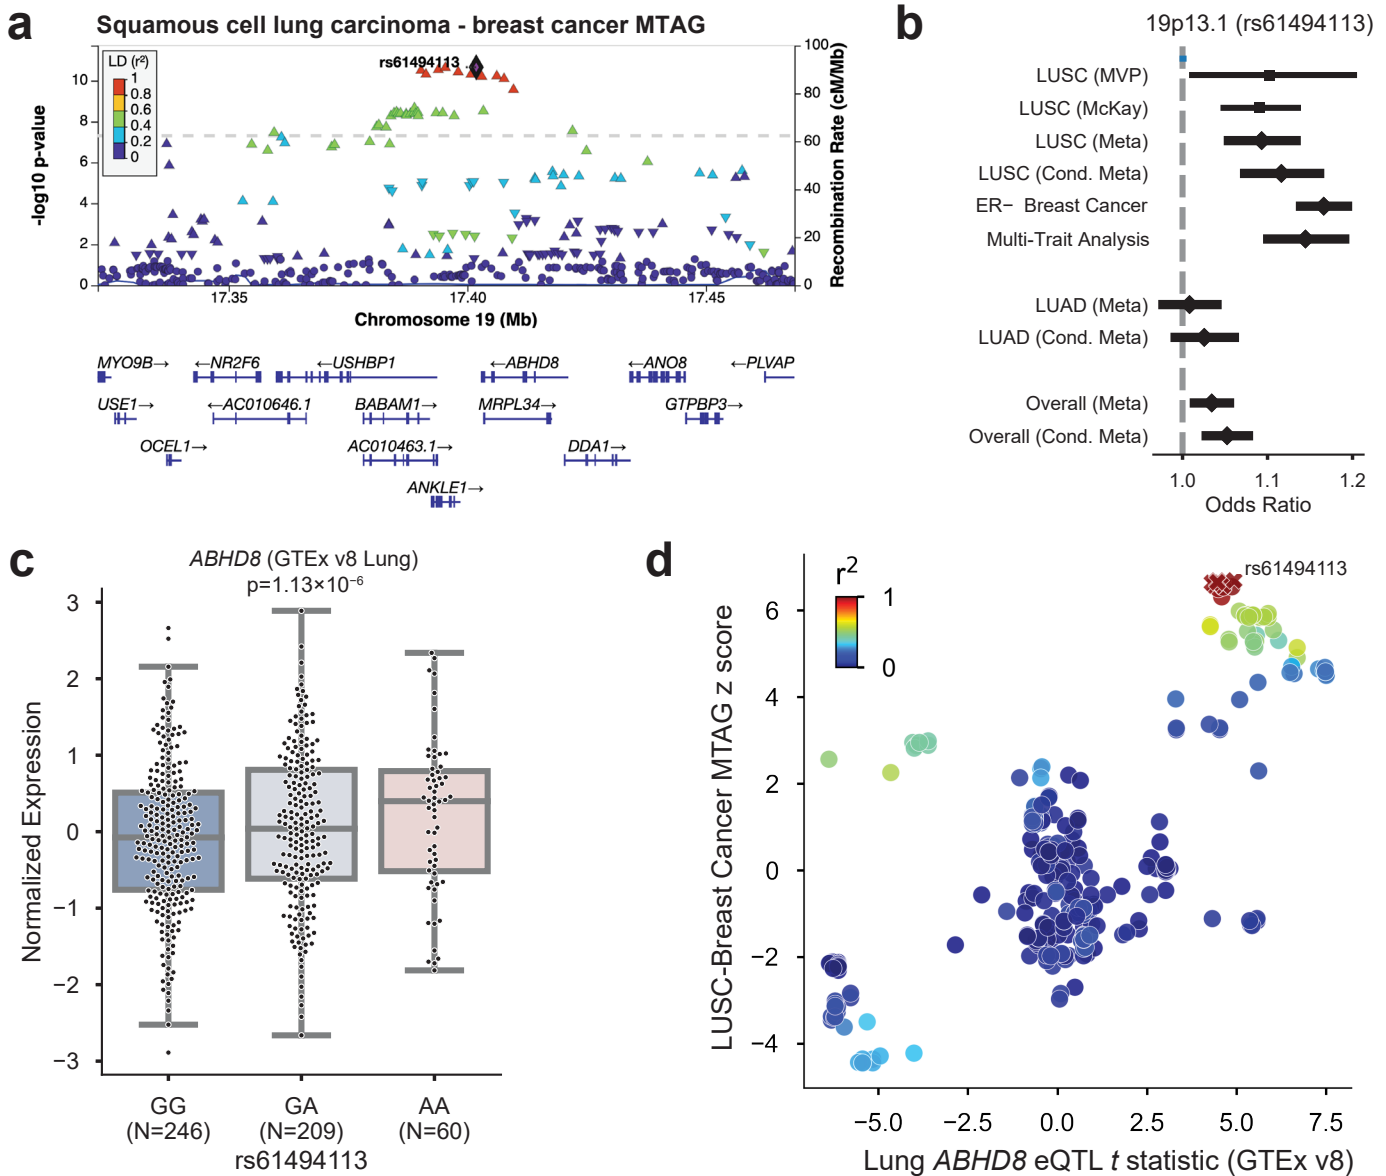

**Figure 4. Significant locus after conditioning on smoking behavior, 19p13.11, has pleiotropic associations with ER-negative breast cancer.** **a)** Regional association plot of the 19p13.11 multi-trait analysis of GWAS (MTAG) locus. **b)** Odds ratios for lead SNP rs61494113 in squamous cell lung carcinoma (LUSC), before and after conditioning on cigarettes per day, and MTAG analysis, compared to lung adenocarcinoma and overall lung cancer. **c)** *ABHD8* expression varies by genotype at rs61494113. **d)** *ABHD8* eQTL t statistic vs LUSC z statistic; red X's indicate the 95% credible set.

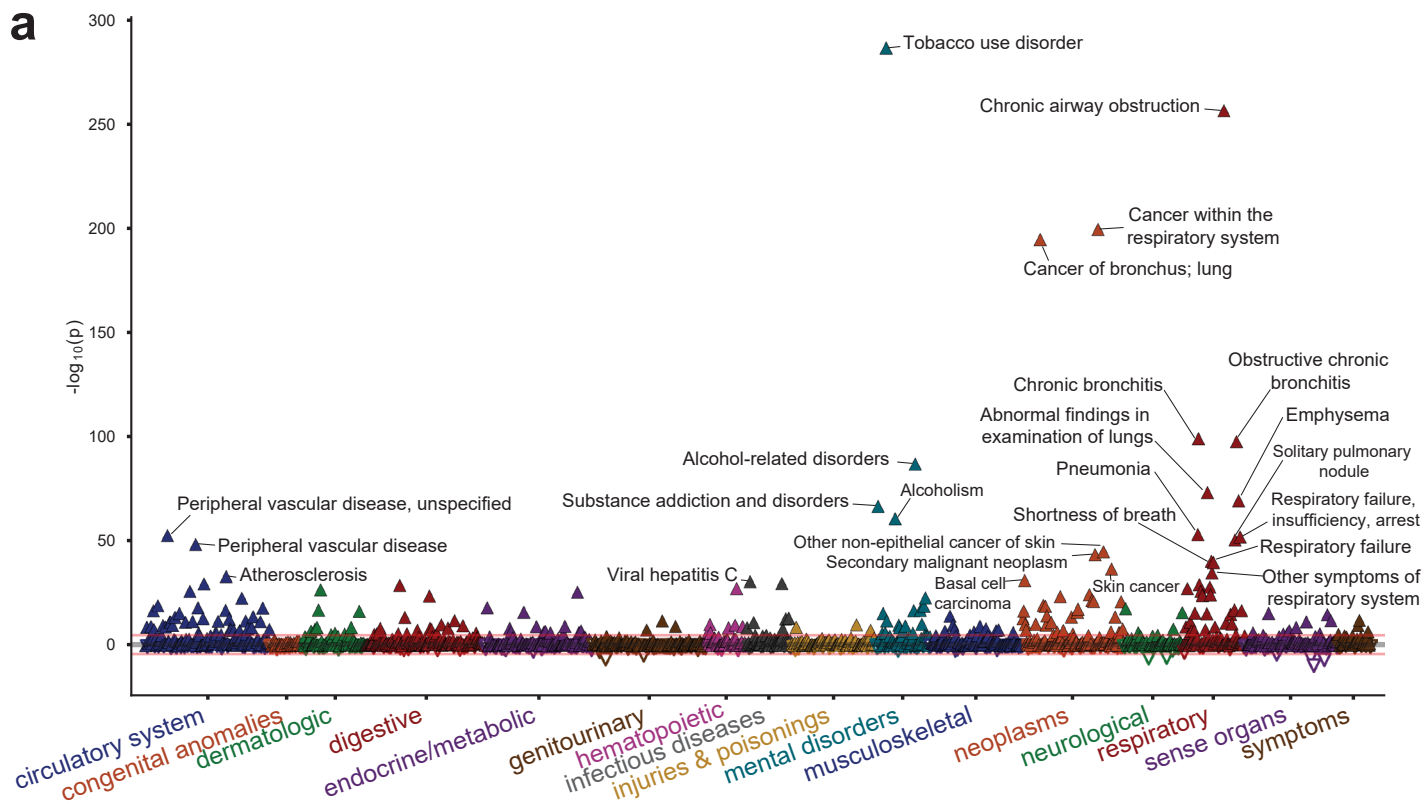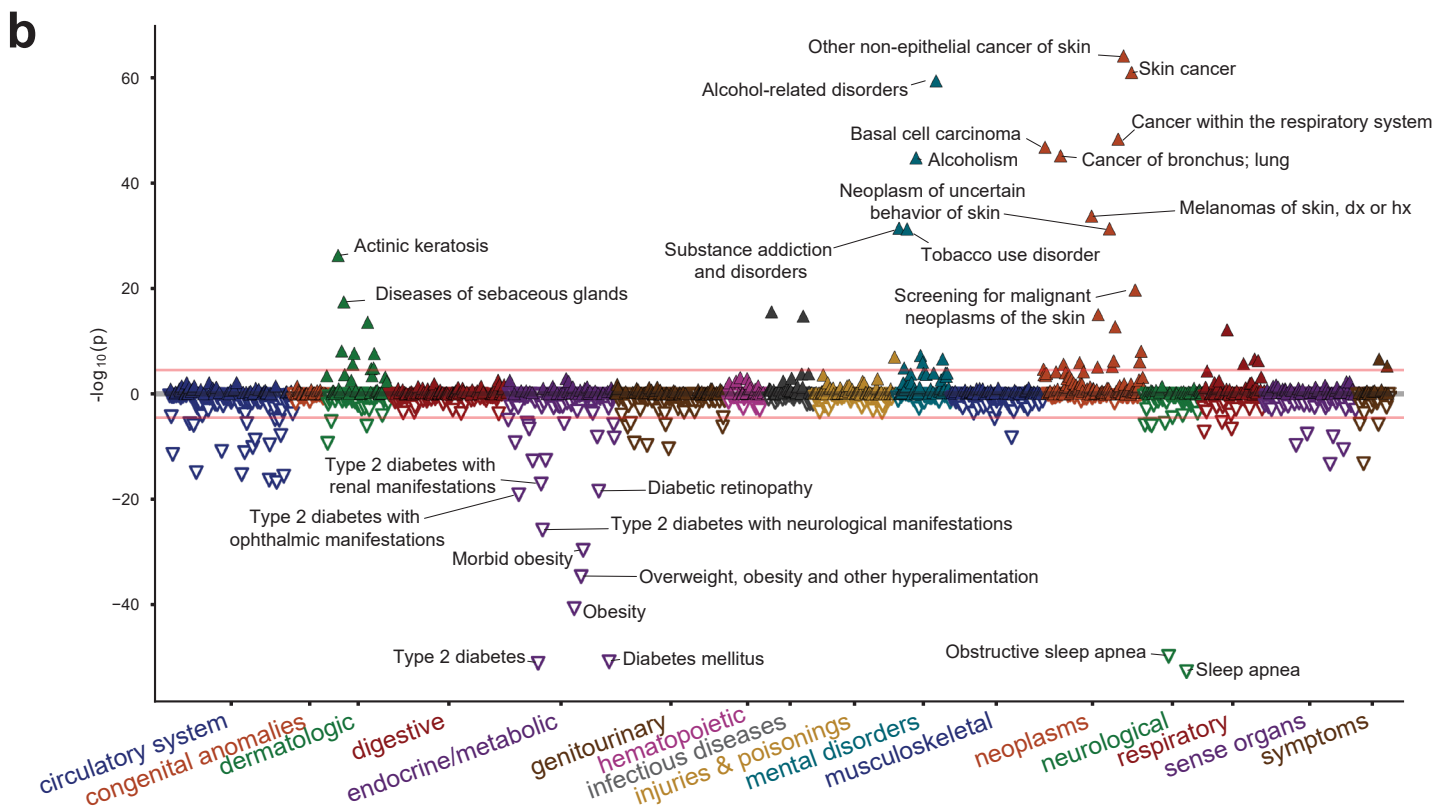

**Figure 5. Phenome-wide association study (PheWAS) of polygenic risk scores (PRS) of lung cancer and lung cancer conditioned on cigarettes per day. a) PheWAS of PRS on lung cancer is mostly confounded with smoking associations. b) PheWAS of the conditional meta-analysis PRS shows associations with skin cancer and metabolic traits.**
